# Supplementary material for: Discrimination of Clinozoisite–Epidote Series by Raman Spectroscopy: An application to Bengal Fan Turbidites (IODP Expedition 354)
Source: MDPI journal article supplement (doi:10.3390/geosciences12120442), 2022-12-01
Supplement: s1 [file s1]

Archive with 5 entries (5 files):
- Epidote Bengal Supplementary Material S1-S2-S3Captions.pdf
- Figure S1.jpg
- Supplementary Material File S3-Epidote full description.pdf
- Supplementary Material FileS1-Epidote Standards.xlsx
- Supplementary Material FileS2-Epidotes Bengal.xlsx
