# Supplementary material for: Discrimination of Clinozoisite–Epidote Series by Raman Spectroscopy: An application to Bengal Fan Turbidites (IODP Expedition 354)
Source: MDPI journal article supplement (doi:10.3390/geosciences12120442), 2022-12-01
Supplement: s1 [file s1 › Supplementary Material FileS1-Epidote Standards.xlsx]

## Sheet: Table S1
Sample	Label	Mineral	Locality	Rock	Selected references
SA1B	E1	Epidote	Molana querry, Pian di Fieno, Ne', Genova, Italy	Pillow lava basalt	Antofilli et al., 1985	https://www.mindat.org/loc-7021.html
SA1A	E2	Epidote	Knappenwand, Tirol, Austria	Anfibolite	Seeman, R., 1986.	https://www.mindat.org/loc-270.html
SA1C	E3	Epidote	Alpe Pirlo, Val Malenco, Sondrio, Italy	Rodingite	Bedogné F., Montrasio A., Sciesa E., 1993.	https://www.mindat.org/loc-60201.html
SA1D	E4	Epidote	Antrona Valley, VCO, Piemonte, Italy	Rodingite	Piccoli et al., 2007.	https://www.mindat.org/loc-25828.html
SA1J	C1	Clinozoisite	Pizzo Tremogge, Val Malenco, Sondrio, Italy	Calcsilicate	Bedogné F., Montrasio A., Sciesa E., 1993.	https://www.mindat.org/loc-27319.html
SA1K	C2	Clinozoisite	Monte Rosa Massif, Beura quarry, VCO, Piemonte, Italy	Ortogneiss	Piccoli G.C., Maletto G., Bosio P., Lombardo B., 2007.	https://www.mindat.org/loc-132752.html
SA1H	Z	Zoisite	Val D'Ayas, Aosta, Italy	Quartz vein	Andò, S. and Garzanti, E., 2014.	https://www.mindat.org/loc-270.html
SA1E	A1	Allanite	Trimouns Talc Mine, Luzenac, Ariège, France	Dolomitic marble	Marty, F., 2004.	https://www.mindat.org/loc-1745.html
SA1F	A2	Allanite	Arvogno, Val Vigezzo, VCO, Piemonte, Italy	Pegmatite in gneiss	Piccoli G.C., Maletto G., Bosio P., Lombardo B., 2007.	https://www.mindat.org/loc-13704.html

## Sheet: Table S2
Sample	MgO	Al2O3	SiO2	CaO	Mno	FeOt	UO2	ThO2	La2O3	Ce2O3	Pr2O3	Nd2O3	total	XFe	%Czo	%Ep	OH peak
E1_1a	0	21.6	37.7	23.78	0	13.49	-	-	-	-	-	-	96.57	0.31209	0.528922	0.471078	3386
E1_2a	0	21.57	38.21	23.92	0	14.05	-	-	-	-	-	-	97.75	0.316914	0.520359	0.479641	3385
E1_3a	0	21.55	38.16	24.19	0	14.01	-	-	-	-	-	-	97.91	0.323096	0.51259	0.48741	3386
E2_1a	0	22.51	37.87	24.1	0	11.69	-	-	-	-	-	-	96.17	0.278234	0.578392	0.421608	3379
E2_2a	0	22.24	37.32	23.78	0	11.88	-	-	-	-	-	-	95.22	0.285264	0.569573	0.430427	3379
E2_3a	0	22.89	38.17	24.09	0.35	11.9	-	-	-	-	-	-	97.4	0.280925	0.576154	0.423846	3381
E2_4a	0	22.95	37.88	23.8	0	11.8	-	-	-	-	-	-	96.43	0.270409	0.591423	0.408577	3379
E3_1a	0	23.51	37.71	24.29	0	11.88	-	-	-	-	-	-	97.39	0.282732	0.579243	0.420757	3376
E3_2a	0	23.46	37.82	24.41	0	11.22	-	-	-	-	-	-	96.91	0.272222	0.59228	0.40772	3378
E3_3a	0	23.57	38.38	24.54	0	11.34	-	-	-	-	-	-	97.83	0.267372	0.597302	0.402698	3375
E3_3b	0	23.2	38.55	24.33	0	11.31	-	-	-	-	-	-	97.39	0.260927	0.603052	0.396948	3376
E3_3c	0	23.56	38.37	24.27	0	11.28	-	-	-	-	-	-	97.48	0.260143	0.606854	0.393146	3374
E3_4a	0	24.07	38.18	24.54	0	10.63	-	-	-	-	-	-	97.42	0.255169	0.616934	0.383066	3373
E3_5a	0	23.49	38.32	24.45	0	11.76	-	-	-	-	-	-	98.02	0.27432	0.587908	0.412092	3373
E3_6a	0	24.39	39.18	24.1	0	10.77	-	-	-	-	-	-	98.44	0.228052	0.651868	0.348132	3372
E3_6b	0	23.64	38.99	24.48	0	11.05	-	-	-	-	-	-	98.16	0.24964	0.619184	0.380816	3374
E3_6c	0	23.86	38.26	24.48	0	11.08	-	-	-	-	-	-	97.68	0.261718	0.606836	0.393164	3375
E3_6d	0	23.31	38.42	24.48	0	11.56	-	-	-	-	-	-	97.77	0.27074	0.591183	0.408817	3372
E4_1a	0	24.61	37.84	24.32	0	9.43	-	-	-	-	-	-	96.2	0.230771	0.653434	0.346566	3369
E4_2a	0	24.82	38.65	23.94	0	9.25	-	-	-	-	-	-	96.66	0.201817	0.691661	0.308339	3371
E4_3a	0	24.65	38.05	24.41	0	9.97	-	-	-	-	-	-	97.08	0.239321	0.641463	0.358537	3369
E4_4a	0	25.17	38.21	24.11	0	9.72	-	-	-	-	-	-	97.21	0.22231	0.666344	0.333656	3369
C1_1a	0	26.78	38.59	24.59	0	6.75	-	-	-	-	-	-	96.71	0.163497	0.752879	0.247121	3361
C1_1b	0	25.98	38.47	24.15	0.56	7.98	-	-	-	-	-	-	97.14	0.192866	0.709336	0.290664	3368
C1_2a	0	25.96	38.48	24.97	0	7.88	-	-	-	-	-	-	97.29	0.200347	0.698905	0.301095	3366
C1_2b	0	27.36	38.57	23.52	0.94	6.69	-	-	-	-	-	-	97.08	0.152925	0.769598	0.230402	3363
C1_3a	0	29.31	39.36	24.33	0.57	4.51	-	-	-	-	-	-	98.08	0.10355	0.843557	0.156443	3362
C1_4a	0.46	27.86	38.41	25.21	0.63	4.83	-	-	-	-	-	-	97.4	0.171529	0.745327	0.254673	3360
C2_1a	0	27.3	38.44	24.78	0	6.28	-	-	-	-	-	-	96.8	0.160768	0.758635	0.241365	3366
C2_2a	0	26.78	39.45	24.02	0	7.86	-	-	-	-	-	-	98.11	0.154642	0.763574	0.236426	3362
Z_1a	0	31.69	38.65	24.56	0	2.41	-	-	-	-	-	-	97.31	0.0678934	-	-	3163
Z_1b	0	31.74	39	25.02	0	2.44	-	-	-	-	-	-	98.2	0.0743402	-	-	3163
Z_2a	0	30.57	38.68	24.55	0	2.68	-	-	-	-	-	-	96.48	0.0714216	-	-	3168
Z_3a	0	31.16	38.62	24.95	0	2.17	-	-	-	-	-	-	96.9	0.0734891	-	-	3164
Z_4a	0	31.46	39.23	25.01	0	2.17	-	-	-	-	-	-	97.87	0.0630641	-	-	3164
A1_1a	3.95	18.86	33.2	11.32	0	4.63	0	0	7.26	12.07	1.39	4.68	97.36	0.148354	-	-	-
A1_2a	4.41	20.14	33.18	10.75	0	4.72	0	0	6.73	12.28	2.1	5.69	100	0.142585	-	-	-
A1_3a	3.99	18.72	33.06	11.14	0	4.44	0	0	7.32	12.84	1.41	4.96	97.88	0.144053	-	-	-
A2_1a	0	16.77	32.24	10.28	1.95	13.53	0.64	2.05	5.97	10.55	1.4	2.9	98.28	0.364064	-	-	-
A2_2a	0	15.86	31.78	8.85	2.74	13.6	0.54	2.03	5.68	10.82	1.54	3.66	97.1	0.378289	-	-	-

## Sheet: Table S3
Samples	v1 (cm-1)	v2 (cm-1)	v3 (cm-1)	v4 (cm-1)	XFe
E1_1a	564.8	980	1084.9	3386.2	0.31209
E1_2a	565.1	979.9	1086.2	3385.5	0.316914
E1_3a	565	979.2	1085.3	3386.4	0.323096
E2_1a	566.5	981.9	1087.8	3379	0.278234
E2_2a	566.7	981.2	1087.8	3378.6	0.285264
E2_3a	566.8	982.2	1087.8	3381	0.280925
E2_4a	566.5	980.9	1087.7	3378.8	0.270409
E3_1a	567.3	982	1089.8	3375.3	0.282732
E3_2a	566.9	981.3	1089	3377.6	0.272222
E3_3a	567.5	982.9	1089	3375	0.267372
E3_3b	567.4	982.7	1088.4	3375.9	0.260927
E3_3c	567.9	983	1089.3	3373.5	0.260143
E3_4a	567.7	982.3	1090.4	3373.4	0.255169
E3_5a	568	982.9	1089.8	3373.3	0.27432
E3_6a	567.7	983.1	1090.6	3372.2	0.228052
E4_1a	568.8	983.7	1091.1	3369.3	0.230771
E4_2a	568.7	983.5	1091.5	3370.9	0.201817
E4_3a	568.1	981.8	1090.8	3369.4	0.239321
E4_4a	568.8	983.7	1091.3	3369.7	0.22231
C1_1a	571.7	985.2	1094.2	3361.6	0.163497
C1_1b	572.3	986.4	1095.6	3367.9	0.192866
C1_2a	570.6	985.4	1092.4	3366.1	0.200347
C1_2b	572.3	986.6	1096.4	3362.7	0.152925
C1_3a	572.7	985.9	1095.1	3362.1	0.10355
C1_4a	572.8	986.1	1093.3	3360.8	0.171529
C2_1a	570.5	984.6	1092.5	3366.2	0.160768
C2_2a	571.8	986.1	1092.8	3362.4	0.154642
