# Supplementary material for: Discrimination of Clinozoisite–Epidote Series by Raman Spectroscopy: An application to Bengal Fan Turbidites (IODP Expedition 354)
Source: MDPI journal article supplement (doi:10.3390/geosciences12120442), 2022-12-01
Supplement: s1 [file s1 › Supplementary Material FileS2-Epidotes Bengal.xlsx]

## Sheet: Table S4
IODP Expedition 354 Holes Used in This Study (time scale after Cohen et al. 2021)
Hole	Latitude (N)	Longitude (E)	Water Depth (m)	Core interval (m)	Recovery (%)	Age	n° samples
U1454B	8°0.4083	85°51.0025	3710	147.4	0.911001	Calabrian-recent	6
U1453A	8°0.4193	86°47.8973	3680	186.7	0.865554	Calabrian-Chibanian	7
U1452B	8°0.4191	87°10.9128	3670	174.5	0.801562	Calabrian-Chibanian	5
U1449A	8°0.4194	88°65.9994	3653	212.5	0.995316	Calabrian-Chibanian	6
U1451A	8°0.4195	88°44.5012	3607	394.9	0.678406	Tortonian-Chibanian	14
U1451B	8°0.4203	88°44.4745	3607	627.6	0.531279	Chattian-Tortonian	3

## Sheet: Table S5
Exp	Site	Hole	Core	Core Type	Section	Top (cm)	Bottom (cm)	Label	Depth (m)	Grain size	µm	Age	Ma
354	U1454	B	4	H	4	20	25	54B4	30	very fine sand	99.939	late Quaternary	<0.3
354	U1454	B	6	F	3	30	35	54B6	40	fine sand	129.3	late Quaternary	<0.3
354	U1454	B	16	F	2	40	45	54B16	85	very fine sand	88.3412	late Quaternary	<0.3
354	U1454	B	25	F	2	70	75	54B25	130	fine sand	128.794	Chibanian	0.3
354	U1454	B	27	F	3	50	55	54B27	135	very coarse silt	50	Chibanian	0.45
354	U1454	B	32	F	2	90	95	54B32	160	very fine sand	87.59	Calabrian	1.2
354	U1453	A	3	H	3	19	24	53A3	20	very coarse silt	31.4737	Chibanian	0.3
354	U1453	A	10	F	1	80	85	53A10	80	very coarse silt	37.668	Chibanian	0.45
354	U1453	A	15	F	3	30	35	53A15	80	very fine sand	80.1606	Calabrian/Chibanian	0.45-0.85
354	U1453	A	20	F	3	30	35	53A20	100	fine sand	136.313	Calabrian/Chibanian	0.45-0.85
354	U1453	A	27	F	2	45	50	53A27	135	coarse silt	24.6497	Calabrian/Chibanian	0.45-0.85
354	U1453	A	32	F	2	50	55	53A32	160	fine sand	215.04	Calabrian	1.2
354	U1453	A	38	F	1	90	95	53A38	190	very coarse silt	36.79	Calabrian?	>1.2
354	U1452	B	8	F	1	60	65	52B8	50	very fine sand	95.7719	Chibanian	0.45
354	U1452	B	18	F	2	55	60	52B18	90	very fine sand	74.8561	Calabrian/Chibanian	0.45-0.85
354	U1452	B	22	F	1	50	55	52B22	115	very fine sand	92.6647	Calabrian/Chibanian	0.45-0.85
354	U1452	B	30	F	2	60	65	52B30	155	very fine sand	91.968	Calabrian/Chibanian	0.45-0.85
354	U1452	B	38	F	1	50	55	52B38	190	very fine sand	92.4269	Calabrian	1.2
354	U1449	A	2	H	2	90	95	49A2	8	very coarse silt	36.7518	Chibanian	0.3
354	U1449	A	5	H	2	50	55	49A5	20	very coarse silt	39.7588	Chibanian	0.45
354	U1449	A	8	H	2	70	75	49A8	35	very fine sand	85.0982	Chibanian	0.6
354	U1449	A	16	F	3	20	25	49A16	80	coarse silt	24.2043	Chibanian	0.75
354	U1449	A	29	F	3	30	35	49A29	150	very fine sand	94.309	Calabrian	1.3-1.6
354	U1449	A	37	F	3	30	35	49A37	208	very coarse silt	60.6733	Calabrian/Gelasian	1.6-1.9
354	U1451	A	4	H	1	20	25	51A4	25	coarse silt	26.0785	Chibanian	0.3
354	U1451	A	6	H	4	45	50	51A6	39	very fine sand	80.27	Chibanian	0.3-0.45
354	U1451	A	7	H	1	10	15	51A7	40	medium sand	302.66	Chibanian	0.3-0.45
354	U1451	A	12	F	3	90	95	51A12	68	very fine sand	74.8658	Chibanian	0.45
354	U1451	A	14	F	3	25	30	51A14	78	very fine sand	110.076	Calabrian	0.8
354	U1451	A	20	F	1	60	65	51A20	103	very fine sand	111.86	Gelasian	2.0
354	U1451	A	22	H	5	95	100	51A22	117	coarse silt	53.8538	Gelasian	2.4
354	U1451	A	27	H	2	25	30	51A27	161	coarse silt	23.7714	Zanclean	5.0
354	U1451	A	31	F	2	50	55	51A31	200	coarse silt	24.0072	Messinian/Tortonian	6.0-8.0
354	U1451	A	39	F	3	80	85	51A39	239	very fine sand	90.4678	Messinian/Tortonian	6.0-8.0
354	U1451	A	66	F	2	90	95	51A66	365	very coarse silt	56.2769	Tortonian	8.0
354	U1451	A	74	F	4	85	90	51A74	405	very fine sand	85.7968	Tortonian	8.0
354	U1451	A	80	F	4	30	35	51A80	434	very coarse silt	34.2119	Tortonian	8.0
354	U1451	A	111	X	2	75	80	51A111	576	medium silt	8.61206	Tortonian	10.0
354	U1451	B	16	R	2	60	65	51B16	658	coarse silt	18.1935	Tortonian	10.8
354	U1451	B	49	R	2	80	85	51B49	969	medium silt	14	Burdigalian	18.0
354	U1451	B	55	R	3	35	40	51B55	1027	coarse silt	29.4143	Aquitanian	23.0

## Sheet: Table S6
Sample	Depth (m)	Age (Ma)	GSZ class	GSZ (µm)	GSZ (phi)	% class	Operator	HMC	tHMC	zircon	tourmaline	rutile	apatite	titanite	monazite	epidote	clinozoisite	zoisite	allanite	garnet	chloritoid	staurolite	kyanite	sillimanite	amphibole	clinopyroxene	enstatite	hypersthene	olivine	spinel	other tHM	total	ZTR	ACI	MMI	% transparent	% opaque	% Fe oxide	% Ti oxide	% HM turbid	% rock fragm.	% soils/turbid	% chlorite	% biotite	% carbonates	% light miner.	total
54B4H	30	<0.3	15-500	99.939	3.32281	0.957	M. Limonta	7.89113	7.43922	1.86916	3.27103	0	3.27103	2.80374	0	8.41121	4.20561	0	0	10.2804	0	0.46729	0.934579	2.33645	55.6075	5.14019	0	0.46729	0.934579	0	0	100	5.14019	7.0028	83.3333	0.718121	0.0402685	0.0033557	0	0	0.0167785	0.0134228	0.0201342	0.174497	0.0033557	0.0100671	1
54B6F	40	<0.3	15-500	129.3	2.95121	0.951	M. Limonta	13.6238	12.0702	3.9604	1.9802	0	0.49505	3.46535	0	6.43564	0.990099	0	0.990099	10.396	0.49505	0.49505	0.49505	0.990099	64.3564	4.45545	0	0	0	0	0	100	5.94059	11.0256	33.3333	0.64127	0.0825397	0	0	0	0.00952381	0.0539683	0.0031746	0.206349	0	0.0031746	1
54B16F	85	<0.3	15-500	88.3412	3.50077	0.94	M. Limonta	3.62505	3.53791	0.985222	2.46305	0	3.94089	1.97044	0	11.33	4.92611	0.492611	0.492611	7.88177	1.47783	0	3.44828	2.95567	48.2759	8.867	0	0	0.492611	0	0	100	3.44828	2.72109	55.5556	0.542781	0.0106952	0	0	0.0026738	0.0106952	0.0160428	0.0427807	0.350267	0.0213904	0.0026738	1
54B25F	130	0.3	15-500	128.794	2.95686	0.936	M. Limonta	8.6738	8.04584	1.46341	2.92683	0	5.36585	3.41463	0	12.6829	7.80488	0	0.487805	12.6829	0	1.95122	0.97561	3.41463	38.5366	5.85366	0	1.46341	0.97561	0	0	100	4.39024	5.90717	44.4444	0.608309	0.0474777	0	0	0	0.00890208	0.0178042	0.0267062	0.290801	0	0	1
54B27F	135	0.45	15-500	50	4.32193	0.899	M. Limonta	2.50398	2.45181	1.51515	4.0404	2.52525	4.54545	3.0303	0	14.6465	10.6061	0	0.505051	5.05051	0.505051	0	4.54545	5.05051	40.9091	2.0202	0	0	0.505051	0	0	100	8.08081	4.93827	69.2308	0.309211	0	0	0	0.00657895	0.0131579	0.0131579	0.0328947	0.605263	0.0131579	0.00657895	1
54B32F	160	1.2	15-500	87.59	3.51309	0.945	M. Limonta	4.64033	4.48417	2.98507	4.47761	0.497512	2.98507	2.48756	0	11.9403	2.48756	0.497512	0	13.4328	0	0	2.98507	1.49254	46.7662	6.96517	0	0	0	0	0	100	7.9602	9.89011	75	0.598214	0.0208333	0	0	0	0.014881	0.0297619	0.0238095	0.297619	0.00892857	0.00595238	1
53A3H	20	0.3	15-500	31.4737	4.98971	0.856	M. Limonta	2.89927	2.77719	2	7	1	4	1.5	0	10.5	2.5	0	0	1.5	0	0	3	3	61.5	1.5	0	0.5	0.5	0	0	100	10	4.06504	75	0.372951	0.0163934	0	0	0	0	0.00409836	0.0327869	0.561475	0.0122951	0	1
53A10F	80	0.45	15-500	37.668	4.73052	0.723	M. Limonta	4.8567	4.74162	2.42718	3.39806	0.485437	2.42718	1.45631	0	7.28155	3.8835	0.485437	0	8.73786	0.485437	0.485437	0.970874	1.45631	54.8544	7.76699	0	2.42718	0.970874	0	0	100	6.31068	10.9145	41.6667	0.567493	0.0137741	0	0	0	0	0.0165289	0.0330579	0.366391	0.00275482	0	1
53A15F	80	0.45-0.85	15-500	80.1606	3.64096	0.902	M. Limonta	4.76597	4.63109	0.485437	1.45631	0.485437	1.94175	1.94175	0	12.6214	1.94175	0.485437	0	8.25243	0	0.485437	0.970874	0.970874	63.1068	3.8835	0	0.485437	0.485437	0	0	100	2.42718	10.5128	66.6667	0.547872	0.0159574	0	0	0	0.00265957	0.0159574	0.018617	0.393617	0.00265957	0.00265957	1
53A20F	100	0.45-0.85	15-500	136.313	2.87501	0.988	M. Limonta	5.5133	5.29079	0.46729	0.934579	0.934579	4.20561	3.73832	0	7.00935	4.20561	0	0	13.5514	0	0.46729	0.46729	2.80374	52.3364	7.00935	0	0.46729	1.40187	0	0	100	2.33645	15.1786	75	0.662539	0.0278638	0	0	0	0.0154799	0.0371517	0.0247678	0.216718	0.0123839	0.00309598	1
53A27F	135	0.45-0.85	15-500	24.6497	5.34228	0.597	M. Limonta	3.30742	3.20407	0	1.47059	1.47059	3.43137	3.43137	0	8.33333	0	3.43137	0.490196	8.33333	0.980392	0	1.47059	4.90196	52.9412	8.33333	0.490196	0.490196	0	0	0	100	2.94118	8.95062	62.5	0.395745	0.012766	0	0	0	0.00425532	0.00425532	0.0553191	0.519149	0.00851064	0	1
53A32F	160	1.2	15-500	215.04	2.21732	0.978	M. Limonta	3.15844	3.11437	1.41509	1.41509	0	1.41509	0.943396	0	7.07547	1.88679	1.41509	0.471698	10.8491	0.471698	0	1.41509	5.18868	58.0189	7.07547	0.471698	0.471698	0	0	0	100	2.83019	14.0921	71.4286	0.605714	0.00857143	0	0	0	0.0114286	0.0285714	0.0257143	0.308571	0	0.0114286	1
53A38F	190	>1.2	15-500	36.79	4.76454	0.72	M. Limonta	3.12286	3.05546	3.75587	2.34742	0	2.34742	0.938967	0.469484	4.69484	6.57277	0	0	11.2676	0	1.87793	3.75587	1.40845	54.4601	6.10329	0	0	0	0	0	100	6.10329	8.90805	58.9744	0.465753	0.010274	0	0	0	0.00342466	0.0136986	0.0445205	0.445205	0.0136986	0.00342466	1
52B8F	50	0.45	15-500	95.7719	3.38425	0.528	M. Limonta	6.93311	6.80229	2.88462	0.961538	0.480769	3.36538	3.36538	0	9.13462	8.17308	0.480769	0	9.61538	0	1.92308	1.44231	1.44231	47.5962	8.65385	0	0.480769	0	0	0	100	4.32692	5.05051	47.619	0.643963	0.0123839	0	0	0	0	0.0123839	0.00928793	0.309598	0.0123839	0	1
52B18F	90	0.45-0.85	15-500	74.8561	3.73974	0.929	M. Limonta	4.48568	4.3423	2.83019	3.30189	1.88679	2.83019	2.35849	0	10.8491	4.24528	0.943396	0	10.8491	0.471698	0	2.83019	4.71698	46.6981	4.24528	0	0.471698	0.471698	0	0	100	8.01887	4.3771	62.5	0.55643	0.0183727	0	0	0	0.00262467	0.0104987	0.023622	0.370079	0.00787402	0.0104987	1
52B22F	115	0.45-0.85	15-500	92.6647	3.43184	0.903	M. Limonta	6.39889	6.02077	2.41546	1.93237	1.44928	2.89855	3.38164	0	9.17874	3.86473	0	0.483092	25.6039	0.483092	1.44928	4.34783	0.483092	35.2657	6.28019	0	0.483092	0	0	0	100	5.7971	10.0457	57.1429	0.598266	0.0375723	0	0	0	0.00289017	0	0.0289017	0.323699	0.00578035	0.00289017	1
52B30F	155	0.45-0.85	15-500	91.968	3.44272	0.958	M. Limonta	3.64239	3.54305	5.82524	0.970874	0.970874	5.33981	3.8835	0	10.6796	4.85437	0	0.485437	16.5049	0.970874	0	1.94175	0.970874	40.7767	4.85437	0	0.485437	0.485437	0	0	100	7.76699	5.55556	44.4444	0.457265	0.0128205	0	0	0	0.00854701	0.0128205	0.0470085	0.448718	0.0042735	0.00854701	1
52B38F	190	1.2	15-500	92.4269	3.43554	0.953	M. Limonta	3.26901	3.07089	3	2.5	0	3.5	1	0	10.5	2.5	0.5	0.5	13.5	0.5	0.5	1.5	2	52	6	0	0	0	0	0	100	5.5	6.08974	46.6667	0.407895	0.0197368	0	0.00657895	0	0.00657895	0.00657895	0.0526316	0.480263	0.0197368	0	1
49A2H	8	0.3	15-500	36.7518	4.76604	0.805	M. Limonta	3.46735	3.37192	1.96078	1.96078	0.980392	1.96078	0.980392	0	8.33333	4.41176	0.490196	0	7.84314	0	0	0.490196	0.980392	61.7647	5.88235	0	1.47059	0.490196	0	0	100	4.90196	6.87831	88.8889	0.473214	0.0133929	0	0	0	0	0.00446429	0.0535714	0.455357	0	0	1
49A5H	20	0.45	15-500	39.7588	4.65258	0.778	M. Limonta	2.86489	2.73407	4.78469	2.39234	0.956938	3.34928	2.39234	0.478469	13.8756	6.2201	0	0	7.17703	0.478469	0	0.956938	1.43541	48.8038	4.78469	0	0	0.956938	0	0.956938	100	8.13397	17.6471	58.3333	0.563342	0.0188679	0.00269542	0.00269542	0.00269542	0.0134771	0	0.032345	0.363881	0	0	1
49A8H	35	0.6	15-500	85.0982	3.55473	0.904	M. Limonta	3.47924	3.4645	2.97872	2.12766	1.2766	2.12766	1.2766	0	12.766	3.82979	0	0	5.95745	0.851064	1.2766	2.97872	1.2766	54.0426	6.38298	0	0.425532	0.425532	0	0	100	6.38298	11.2861	57.7778	0.643836	0.00273973	0	0	0	0.00547945	0.0219178	0.0328767	0.282192	0.00547945	0.00547945	1
49A16F	80	0.75	15-500	24.2043	5.36859	0.643	M. Limonta	3.67584	3.48489	1.35135	4.95495	0.900901	2.7027	2.7027	0.45045	12.6126	4.95495	0	0	11.2613	0	0	0.45045	4.5045	45.045	6.75676	0	0	1.35135	0	0	100	7.20721	9.33333	83.3333	0.434524	0.0238095	0	0	0	0.00595238	0	0.0535714	0.482143	0	0	1
49A29F	150	1.3-1.6	15-500	94.309	3.40646	0.922	M. Limonta	5.43437	5.23494	1.90476	1.42857	0.952381	1.42857	3.33333	0	8.09524	6.19048	0.47619	0.47619	9.04762	0	0	0.952381	2.38095	57.1429	6.19048	0	0	0	0	0	100	4.28571	11.9444	83.3333	0.570652	0.0190217	0.00271739	0	0	0.00543478	0.0326087	0.0190217	0.347826	0.00271739	0	1
49A37F	208	1.6-1.9	15-500	60.6733	4.04279	0.865	M. Limonta	2.74387	2.74387	3.48259	7.46269	0.497512	3.9801	1.49254	0	11.9403	4.47761	0	0	9.45274	0	0	0.497512	3.48259	47.7612	5.47264	0	0	0	0	0	100	11.4428	10.7639	91.6667	0.383495	0	0	0	0	0	0.0145631	0.038835	0.563107	0	0	1
51A4H	25	0.3	15-500	26.0785	5.26099	0.667	M. Limonta	3.45136	3.37466	1.48515	4.45545	0.990099	1.48515	5.44554	0	9.90099	4.45545	0.49505	0	5.94059	0	0.49505	1.48515	3.46535	55.9406	3.46535	0	0	0.49505	0	0	100	6.93069	8.84956	66.6667	0.421053	0.00956938	0	0	0	0	0.00478469	0.076555	0.483254	0.00478469	0	1
51A6H	39	0.3-0.45	15-500	80.27	3.639	0.888	M. Limonta	3.71912	3.71912	2.83019	2.83019	0	2.35849	5.18868	0	7.54717	3.30189	0	0	9.43396	0.471698	0.471698	1.88679	4.71698	56.1321	2.35849	0	0.471698	0	0	0	100	5.66038	10.3641	50	0.455497	0	0	0	0	0.0052356	0.0418848	0.0418848	0.439791	0.0052356	0.0104712	1
51A7H	40	0.3-0.45	15-500	302.66	1.72423	0.915	M. Limonta	5.32262	4.69643	1.42857	0.952381	0	1.42857	2.85714	0	4.28571	2.85714	0.47619	0	24.2857	0	0.952381	0.952381	3.33333	50.9524	3.80952	0	1.42857	0	0	0	100	2.38095	19.0939	50	0.772059	0.0955882	0.00367647	0	0.00367647	0.00367647	0.0441176	0.0110294	0.0661765	0	0	1
51A12F	68	0.45	15-500	74.8658	3.73955	0.923	M. Limonta	3.55873	3.55873	0.485437	1.94175	1.45631	3.39806	4.85437	0	12.6214	4.85437	0	0	8.73786	0	0.485437	3.39806	1.45631	50.4854	3.39806	0.485437	0.970874	0	0.485437	0.485437	100	3.8835	8.33333	62.5	0.503876	0	0	0	0	0	0	0.0387597	0.422481	0.0348837	0	1
51A14F	78	0.8	15-500	110.076	3.18343	0.87	M. Limonta	5.03185	4.80208	0.478469	0.478469	1.43541	2.39234	3.34928	0	7.17703	3.34928	0.956938	0	8.61244	0	1.43541	2.39234	3.82775	59.3301	3.34928	0	0.956938	0	0	0.478469	100	2.39234	9.67742	54.1667	0.725694	0.0347222	0	0	0	0.0138889	0.0138889	0.00347222	0.208333	0	0	1
51A20F	103	2	15-500	111.86	3.16023	0.931	M. Limonta	4.18206	4.00452	1.97044	1.97044	0.492611	0.985222	3.94089	0	5.91133	5.91133	0.492611	0.492611	13.3005	0	0	0.985222	2.95567	56.1576	3.44828	0.492611	0.492611	0	0	0	100	4.4335	11.6959	83.3333	0.665574	0.0295082	0	0	0	0.0131148	0.0229508	0.0262295	0.242623	0	0	1
51A22H	117	2.4	15-500	53.8538	4.21481	0.841	M. Limonta	4.03666	3.75914	2.9703	3.46535	0	1.48515	4.45545	0	3.9604	1.9802	0	0	10.8911	0	0.49505	1.48515	3.46535	60.396	4.45545	0.49505	0	0	0	0	100	6.43564	12.0219	58.3333	0.491749	0.0363036	0	0	0	0	0.00660066	0.0528053	0.382838	0.019802	0.00990099	1
51A27H	161	5	15-500	23.7714	5.39463	0.783	M. Limonta	1.7248	1.6748	4.0404	8.58586	1.51515	7.57576	4.54545	0	14.1414	10.101	0.505051	0	12.1212	0.505051	0	1.0101	2.0202	33.3333	0	0	0	0	0	0	100	14.1414	12.6263	58.3333	0.325243	0.00970874	0	0	0	0.00485437	0.00970874	0.0970874	0.485437	0.0631068	0.00485437	1
51A31F	200	6_8	15-500	24.0072	5.38039	0.66	M. Limonta	1.88033	1.80982	1.47059	18.6275	0.490196	5.88235	4.90196	0	13.7255	9.31373	0.490196	0	10.7843	0.490196	2.45098	3.43137	1.96078	25.4902	0.490196	0	0	0	0	0	100	20.5882	10.2564	52.381	0.37931	0.0147783	0	0	0	0.00985222	0.0197044	0.0689655	0.44335	0.0640394	0	1
51A39F	239	6_8	15-500	90.4678	3.46645	0.914	M. Limonta	2.13902	2.00533	1.51515	3.0303	0	3.53535	3.53535	0.505051	12.1212	5.55556	0.505051	0	12.1212	0.505051	0.505051	1.51515	4.0404	50.5051	0.505051	0	0	0	0	0	100	4.54545	11	55.5556	0.493421	0.0296053	0	0.00328947	0	0.0197368	0.0953947	0.0526316	0.256579	0.0460526	0.00328947	1
51A66F	365	8	15-500	56.2769	4.15131	0.852	M. Limonta	2.29012	2.10691	2.31481	6.94444	1.85185	6.01852	0.925926	0	17.5926	6.94444	0.462963	0	20.8333	0.462963	0	1.85185	2.31481	29.1667	2.31481	0	0	0	0	0	100	11.1111	32.7957	61.1111	0.401747	0.0349345	0	0	0	0.00873362	0.0305677	0.131004	0.375546	0.0174672	0	1
51A74F	405	8	15-500	85.7968	3.54293	0.905	M. Limonta	2.22722	2.07983	1.9802	4.9505	0.49505	3.9604	3.46535	0	15.8416	5.94059	0.990099	0	9.40594	0	0.49505	0	2.47525	48.5149	1.48515	0	0	0	0	0	100	7.42574	18.3673	83.3333	0.494163	0.0350195	0	0	0	0.0077821	0.0428016	0.077821	0.311284	0.0233463	0.0077821	1
51A80F	434	8	15-500	34.2119	4.86936	0.799	M. Limonta	2.78294	2.51999	3.7037	11.1111	0.462963	5.55556	3.24074	0	16.2037	6.48148	0.462963	1.38889	11.5741	1.38889	0.462963	0.462963	1.85185	35.1852	0	0	0.462963	0	0	0	100	15.2778	17.9825	33.3333	0.471311	0.045082	0	0	0.00409836	0.00409836	0.0737705	0.110656	0.266393	0.0204918	0.00409836	1
51A111X	576	10	>5	8.61206	6.85943	0.455	M. Limonta	0.838031	0.804509	2.59067	3.62694	0.518135	3.62694	3.10881	0	18.1347	10.8808	0	0	9.32642	1.5544	0	1.03627	0.518135	44.0415	0	0	0	0	0	1.03627	100	6.73575	2.35294	38.8889	0.356436	0.0148515	0	0	0	0	0.019802	0.133663	0.420792	0.0445545	0.00990099	1
51B16R	658	10.8	15-500	18.1935	5.78043	0.527	M. Limonta	1.09081	0.883033	5.05051	16.1616	2.52525	4.0404	3.53535	0	16.6667	6.56566	0.505051	0	12.6263	0.505051	1.0101	1.51515	1.0101	26.7677	1.0101	0	0	0	0.505051	0	100	23.7374	19.4969	44.4444	0.217949	0.0470085	0	0	0.0042735	0.132479	0.0555556	0.115385	0.346154	0.0769231	0.0042735	1
51B49R	969	18	>5	14	6.15843	0.402	M. Limonta	0.761643	0.713285	10.7843	26.9608	2.45098	17.6471	1.47059	0	10.7843	6.37255	0.490196	0	21.5686	0	0.490196	0	0	0.490196	0	0	0	0	0	0.490196	100	40.1961	n.d.	n.d.	0.283654	0.0192308	0	0	0	0.00480769	0.0288462	0.105769	0.5	0.0384615	0.0192308	1
51B55R	1027	23	>5	29.4143	5.08734	0.742	M. Limonta	0.672932	0.60366	7.72947	22.7053	2.41546	14.4928	2.89855	0	18.8406	7.72947	0.966184	2.41546	16.4251	0.483092	0.966184	0.966184	0.483092	0.483092	0	0	0	0	0	0	100	32.8502	n.d.	40	0.254167	0.0291667	0	0	0	0.00416667	0.05	0.15	0.4375	0.075	0	1

## Sheet: Table S7
Sample	Depth (m)	Age	GSZ (µm)	n°	tHM%	% EpGM	%Ep	%Czo	%Zo	%Aln	% Ep RF
54B4H	30	Late Quaternary	99.939	27	7.43922	12.1495	62.963	33.3333	0	0	3.7037
54B6F	40	Late Quaternary	129.3	17	12.0702	8.41584	76.4706	11.7647	0	11.7647	0
54B16F	85	Late Quaternary	88.3412	35	3.53791	17.2414	65.7143	28.5714	2.85714	2.85714	0
54B25F	130	Middle Quaternary	128.794	43	8.04584	20.4878	58.1395	37.2093	0	2.32558	2.32558
54B27F	135	Middle Quaternary	50	51	2.45181	25.7576	56.8627	41.1765	0	1.96078	0
54B32F	160	Early Quaternary	87.59	30	4.48417	13.4328	70	16.6667	3.33333	0	10
53A3H	20	Middle Quaternary	31.4737	26	2.77719	13	80.7692	19.2308	0	0	0
53A10F	80	Middle Quaternary	37.668	24	4.74162	11.6505	62.5	33.3333	4.16667	0	0
53A15F	80	Middle Quaternary	80.1606	31	4.63109	15.0485	83.871	12.9032	3.22581	0	0
53A20F	100	Middle Quaternary	136.313	24	5.29079	11.215	62.5	37.5	0	0	0
53A27F	135	Middle Quaternary	24.6497	25	3.20407	12.2549	68	0	28	4	0
53A32F	160	Early Quaternary	215.04	23	3.11437	10.8491	65.2174	17.3913	13.0435	4.34783	0
53A38F	190	Early Quaternary	36.79	24	3.05546	11.2676	41.6667	58.3333	0	0	0
52B8F	50	Middle Quaternary	95.7719	37	6.80229	16.3462	43.2432	45.9459	2.7027	0	8.10811
52B18F	90	Middle Quaternary	74.8561	34	4.3423	16.0377	67.6471	26.4706	5.88235	0	0
52B22F	115	Middle Quaternary	92.6647	28	6.02077	13.5266	67.8571	28.5714	0	3.57143	0
52B30F	155	Middle Quaternary	91.968	33	3.54305	16.0194	66.6667	30.303	0	3.0303	0
52B38F	190	Early Quaternary	92.4269	28	3.07089	14	75	17.8571	3.57143	3.57143	0
49A2H	8	Middle Quaternary	36.7518	27	3.37192	13.2353	62.963	33.3333	3.7037	0	0
49A5H	20	Middle Quaternary	39.7588	42	2.73407	20.0957	69.0476	30.9524	0	0	0
49A8H	35	Early Quaternary	85.0982	39	3.4645	16.5957	76.9231	23.0769	0	0	0
49A16F	80	Early Quaternary	24.2043	39	3.48489	17.5676	71.7949	28.2051	0	0	0
49A29F	150	Early Quaternary	94.309	32	5.23494	15.2381	53.125	40.625	3.125	3.125	0
49A37F	208	Early Quaternary	60.6733	33	2.74387	16.4179	72.7273	27.2727	0	0	0
51A4H	25	Middle Quaternary	26.0785	30	3.37466	14.8515	66.6667	30	3.33333	0	0
51A6H	39	Middle Quaternary	80.27	23	3.71912	10.8491	69.5652	30.4348	0	0	0
51A7H	40	Middle Quaternary	302.66	16	4.69643	7.61905	56.25	37.5	6.25	0	0
51A12F	68	Middle Quaternary	74.8658	36	3.55873	17.4757	72.2222	27.7778	0	0	0
51A14F	78	Early Quaternary	110.076	24	4.80208	11.4833	62.5	29.1667	8.33333	0	0
51A20F	103	Early Quaternary	111.86	26	4.00452	12.8079	46.1538	46.1538	3.84615	3.84615	0
51A22H	117	Early Quaternary	53.8538	12	3.75914	5.94059	66.6667	33.3333	0	0	0
51A27H	161	Zancl.-Tortonian	23.7714	49	1.6748	24.7475	57.1429	40.8163	2.04082	0	0
51A31F	200	Zancl.-Tortonian	24.0072	48	1.80982	23.5294	58.3333	39.5833	2.08333	0	0
51A39F	239	Zancl.-Tortonian	90.4678	36	2.00533	18.1818	66.6667	30.5556	2.77778	0	0
51A66F	365	Zancl.-Tortonian	56.2769	54	2.10691	25	70.3704	27.7778	1.85185	0	0
51A74F	405	Zancl.-Tortonian	85.7968	46	2.07983	22.7723	69.5652	26.087	4.34783	0	0
51A80F	434	Zancl.-Tortonian	34.2119	53	2.51999	24.537	66.0377	26.4151	1.88679	5.66038	0
51A111X	576	Zancl.-Tortonian	8.61206	56	0.38028	29.0155	62.5	37.5	0	0	0
51B16R	658	Zancl.-Tortonian	18.1935	47	0.883033	23.7374	70.2128	27.6596	2.12766	0	0
51B49R	969	Lower Miocene	14	36	0.713285	17.6471	61.1111	36.1111	2.77778	0	0
51B55R	1027	Lower Miocene	29.4143	62	0.60366	29.9517	62.9032	25.8065	3.22581	8.06452	0

## Sheet: Table S8
Sample	Age	Grain n°	OH peak	Classification	XFe
54B4H	Late Quaternary	54B4H_1	3370	Epidote	0.220104
54B4H	Late Quaternary	54B4H_3	3390	Epidote	0.362144
54B4H	Late Quaternary	54B4H_4	3391	Epidote	0.369246
54B4H	Late Quaternary	54B4H_5	3377	Epidote	0.269818
54B4H	Late Quaternary	54B4H_7	3356	Clinozoisite	0.120676
54B4H	Late Quaternary	54B4H_10	3378	Epidote	0.27692
54B4H	Late Quaternary	54B4H_11	3371	Epidote	0.227206
54B4H	Late Quaternary	54B4H_12	3357	Clinozoisite	0.127778
54B4H	Late Quaternary	54B4H_13	3357	Clinozoisite	0.127778
54B4H	Late Quaternary	54B4H_14	3374	Epidote	0.248512
54B4H	Late Quaternary	54B4H_15	3376	Epidote	0.262716
54B4H	Late Quaternary	54B4H_16	3364	Clinozoisite	0.177492
54B4H	Late Quaternary	54B4H_19	3377	Epidote	0.269818
54B4H	Late Quaternary	54B4H_21	3356	Clinozoisite	0.120676
54B4H	Late Quaternary	54B4H_23	3360	Clinozoisite	0.149084
54B4H	Late Quaternary	54B4H_24	3375	Epidote	0.255614
54B4H	Late Quaternary	54B4H_25	3361	Clinozoisite	0.156186
54B4H	Late Quaternary	54B4H_26	3374	Epidote	0.248512
54B4H	Late Quaternary	54B4H_27	3369	Epidote	0.213002
54B4H	Late Quaternary	54B4H_28	3376	Epidote	0.262716
54B4H	Late Quaternary	54B4H_29	3376	Epidote	0.262716
54B4H	Late Quaternary	54B4H_30	3369	Epidote	0.213002
54B4H	Late Quaternary	54B4H_31	3372	Epidote	0.234308
54B4H	Late Quaternary	54B4H_32	3362	Clinozoisite	0.163288
54B4H	Late Quaternary	54B4H_33	3372	Epidote	0.234308
54B4H	Late Quaternary	54B4H_35	3365	Clinozoisite	0.184594
54B6F	Late Quaternary	54B6F_1	3372	Epidote	0.234308
54B6F	Late Quaternary	54B6F_2	3371	Epidote	0.227206
54B6F	Late Quaternary	54B6F_3	3379	Epidote	0.284022
54B6F	Late Quaternary	54B6F_4	3384	Epidote	0.319532
54B6F	Late Quaternary	54B6F_5	3373	Epidote	0.24141
54B6F	Late Quaternary	54B6F_6	3367	Clinozoisite	0.198798
54B6F	Late Quaternary	54B6F_7	3381	Epidote	0.298226
54B6F	Late Quaternary	54B6F_8	3377	Epidote	0.269818
54B6F	Late Quaternary	54B6F_9	3380	Epidote	0.291124
54B6F	Late Quaternary	54B6F_10	3369	Epidote	0.213002
54B6F	Late Quaternary	54B6F_11	3374	Epidote	0.248512
54B6F	Late Quaternary	54B6F_13	3378	Epidote	0.27692
54B6F	Late Quaternary	54B6F_14	3369	Epidote	0.213002
54B6F	Late Quaternary	54B6F_17	3367	Clinozoisite	0.198798
54B6F	Late Quaternary	54B6F_18	3380	Epidote	0.291124
54B16F	Late Quaternary	54B16F_3	3373	Epidote	0.24141
54B16F	Late Quaternary	54B16F_6	3383	Epidote	0.31243
54B16F	Late Quaternary	54B16F_7	3381	Epidote	0.298226
54B16F	Late Quaternary	54B16F_10	3361	Clinozoisite	0.156186
54B16F	Late Quaternary	54B16F_12	3387	Epidote	0.340838
54B16F	Late Quaternary	54B16F_13	3364	Clinozoisite	0.177492
54B16F	Late Quaternary	54B16F_14	3378	Epidote	0.27692
54B16F	Late Quaternary	54B16F_16	3377	Epidote	0.269818
54B16F	Late Quaternary	54B16F_17	3368	Clinozoisite	0.2059
54B16F	Late Quaternary	54B16F_18	3369	Epidote	0.213002
54B16F	Late Quaternary	54B16F_19	3366	Clinozoisite	0.191696
54B16F	Late Quaternary	54B16F_21	3356	Clinozoisite	0.120676
54B16F	Late Quaternary	54B16F_22	3356	Clinozoisite	0.120676
54B16F	Late Quaternary	54B16F_25	3363	Clinozoisite	0.17039
54B16F	Late Quaternary	54B16F_26	3368	Clinozoisite	0.2059
54B16F	Late Quaternary	54B16F_27	3375	Epidote	0.255614
54B16F	Late Quaternary	54B16F_28	3377	Epidote	0.269818
54B16F	Late Quaternary	54B16F_29	3382	Epidote	0.305328
54B16F	Late Quaternary	54B16F_30	3370	Epidote	0.220104
54B16F	Late Quaternary	54B16F_31	3384	Epidote	0.319532
54B16F	Late Quaternary	54B16F_33	3359	Clinozoisite	0.141982
54B16F	Late Quaternary	54B16F_34	3368	Clinozoisite	0.2059
54B16F	Late Quaternary	54B16F_36	3373	Epidote	0.24141
54B16F	Late Quaternary	54B16F_41	3374	Epidote	0.248512
54B16F	Late Quaternary	54B16F_43	3390	Epidote	0.362144
54B16F	Late Quaternary	54B16F_44	3384	Epidote	0.319532
54B16F	Late Quaternary	54B16F_45	3376	Epidote	0.262716
54B16F	Late Quaternary	54B16F_46	3375	Epidote	0.255614
54B16F	Late Quaternary	54B16F_47	3369	Epidote	0.213002
54B16F	Late Quaternary	54B16F_48	3371	Epidote	0.227206
54B16F	Late Quaternary	54B16F_49	3385	Epidote	0.326634
54B16F	Late Quaternary	54B16F_50	3370	Epidote	0.220104
54B16F	Late Quaternary	54B16F_51	3375	Epidote	0.255614
54B25F	Middle Quaternary	54B25F_2	3359	Clinozoisite	0.141982
54B25F	Middle Quaternary	54B25F_3	3389	Epidote	0.355042
54B25F	Middle Quaternary	54B25F_5	3376	Epidote	0.262716
54B25F	Middle Quaternary	54B25F_7	3362	Clinozoisite	0.163288
54B25F	Middle Quaternary	54B25F_9	3393	Epidote	0.38345
54B25F	Middle Quaternary	54B25F_10	3386	Epidote	0.333736
54B25F	Middle Quaternary	54B25F_11	3364	Clinozoisite	0.177492
54B25F	Middle Quaternary	54B25F_13	3365	Clinozoisite	0.184594
54B25F	Middle Quaternary	54B25F_14	3376	Epidote	0.262716
54B25F	Middle Quaternary	54B25F_15	3372	Epidote	0.234308
54B25F	Middle Quaternary	54B25F_16	3382	Epidote	0.305328
54B25F	Middle Quaternary	54B25F_17	3368	Clinozoisite	0.2059
54B25F	Middle Quaternary	54B25F_18	3364	Clinozoisite	0.177492
54B25F	Middle Quaternary	54B25F_19	3363	Clinozoisite	0.17039
54B25F	Middle Quaternary	54B25F_20	3383	Epidote	0.31243
54B25F	Middle Quaternary	54B25F_21	3379	Epidote	0.284022
54B25F	Middle Quaternary	54B25F_22	3386	Epidote	0.333736
54B25F	Middle Quaternary	54B25F_25	3384	Epidote	0.319532
54B25F	Middle Quaternary	54B25F_26	3373	Epidote	0.24141
54B25F	Middle Quaternary	54B25F_28	3375	Epidote	0.255614
54B25F	Middle Quaternary	54B25F_29	3385	Epidote	0.326634
54B25F	Middle Quaternary	54B25F_30	3368	Clinozoisite	0.2059
54B25F	Middle Quaternary	54B25F_31	3364	Clinozoisite	0.177492
54B25F	Middle Quaternary	54B25F_32	3368	Clinozoisite	0.2059
54B25F	Middle Quaternary	54B25F_34	3376	Epidote	0.262716
54B25F	Middle Quaternary	54B25F_36	3362	Clinozoisite	0.163288
54B25F	Middle Quaternary	54B25F_38	3374	Epidote	0.248512
54B25F	Middle Quaternary	54B25F_39	3366	Clinozoisite	0.191696
54B25F	Middle Quaternary	54B25F_40	3374	Epidote	0.248512
54B25F	Middle Quaternary	54B25F_42	3374	Epidote	0.248512
54B25F	Middle Quaternary	54B25F_43	3376	Epidote	0.262716
54B25F	Middle Quaternary	54B25F_44	3367	Clinozoisite	0.198798
54B25F	Middle Quaternary	54B25F_45	3360	Clinozoisite	0.149084
54B25F	Middle Quaternary	54B25F_47	3369	Epidote	0.213002
54B25F	Middle Quaternary	54B25F_48	3382	Epidote	0.305328
54B25F	Middle Quaternary	54B25F_49	3382	Epidote	0.305328
54B25F	Middle Quaternary	54B25F_50	3387	Epidote	0.340838
54B25F	Middle Quaternary	54B25F_53	3385	Epidote	0.326634
54B25F	Middle Quaternary	54B25F_55	3376	Epidote	0.262716
54B25F	Middle Quaternary	54B25F_56	3367	Clinozoisite	0.198798
54B25F	Middle Quaternary	54B25F_57	3364	Clinozoisite	0.177492
54B27F	Middle Quaternary	54B27F_1	3373	Epidote	0.24141
54B27F	Middle Quaternary	54B27F_2	3376	Epidote	0.262716
54B27F	Middle Quaternary	54B27F_3	3364	Clinozoisite	0.177492
54B27F	Middle Quaternary	54B27F_4	3382	Epidote	0.305328
54B27F	Middle Quaternary	54B27F_5	3378	Epidote	0.27692
54B27F	Middle Quaternary	54B27F_6	3378	Epidote	0.27692
54B27F	Middle Quaternary	54B27F_7	3367	Clinozoisite	0.198798
54B27F	Middle Quaternary	54B27F_8	3360	Clinozoisite	0.149084
54B27F	Middle Quaternary	54B27F_11	3370	Epidote	0.220104
54B27F	Middle Quaternary	54B27F_12	3364	Clinozoisite	0.177492
54B27F	Middle Quaternary	54B27F_13	3380	Epidote	0.291124
54B27F	Middle Quaternary	54B27F_15	3353	Clinozoisite	0.09937
54B27F	Middle Quaternary	54B27F_16	3362	Clinozoisite	0.163288
54B27F	Middle Quaternary	54B27F_17	3374	Epidote	0.248512
54B27F	Middle Quaternary	54B27F_18	3363	Clinozoisite	0.17039
54B27F	Middle Quaternary	54B27F_19	3382	Epidote	0.305328
54B27F	Middle Quaternary	54B27F_22	3382	Epidote	0.305328
54B27F	Middle Quaternary	54B27F_24	3357	Clinozoisite	0.127778
54B27F	Middle Quaternary	54B27F_28	3378	Epidote	0.27692
54B27F	Middle Quaternary	54B27F_29	3366	Clinozoisite	0.191696
54B27F	Middle Quaternary	54B27F_31	3364	Clinozoisite	0.177492
54B27F	Middle Quaternary	54B27F_32	3386	Epidote	0.333736
54B27F	Middle Quaternary	54B27F_33	3369	Epidote	0.213002
54B27F	Middle Quaternary	54B27F_35	3369	Epidote	0.213002
54B27F	Middle Quaternary	54B27F_36	3362	Clinozoisite	0.163288
54B27F	Middle Quaternary	54B27F_37	3361	Clinozoisite	0.156186
54B27F	Middle Quaternary	54B27F_38	3369	Epidote	0.213002
54B27F	Middle Quaternary	54B27F_39	3358	Clinozoisite	0.13488
54B27F	Middle Quaternary	54B27F_41	3358	Clinozoisite	0.13488
54B27F	Middle Quaternary	54B27F_42	3367	Clinozoisite	0.198798
54B27F	Middle Quaternary	54B27F_43	3360	Clinozoisite	0.149084
54B27F	Middle Quaternary	54B27F_45	3368	Clinozoisite	0.2059
54B27F	Middle Quaternary	54B27F_47	3360	Clinozoisite	0.149084
54B27F	Middle Quaternary	54B27F_48	3379	Epidote	0.284022
54B27F	Middle Quaternary	54B27F_49	3364	Clinozoisite	0.177492
54B27F	Middle Quaternary	54B27F_50	3378	Epidote	0.27692
54B27F	Middle Quaternary	54B27F_51	3372	Epidote	0.234308
54B27F	Middle Quaternary	54B27F_53	3367	Clinozoisite	0.198798
54B27F	Middle Quaternary	54B27F_54	3376	Epidote	0.262716
54B27F	Middle Quaternary	54B27F_55	3371	Epidote	0.227206
54B27F	Middle Quaternary	54B27F_57	3376	Epidote	0.262716
54B27F	Middle Quaternary	54B27F_58	3390	Epidote	0.362144
54B27F	Middle Quaternary	54B27F_60	3372	Epidote	0.234308
54B27F	Middle Quaternary	54B27F_62	3365	Clinozoisite	0.184594
54B27F	Middle Quaternary	54B27F_64	3370	Epidote	0.220104
54B27F	Middle Quaternary	54B27F_65	3382	Epidote	0.305328
54B27F	Middle Quaternary	54B27F_66	3380	Epidote	0.291124
54B32F	Early Quaternary	54B32F_2	3378	Epidote	0.27692
54B32F	Early Quaternary	54B32F_3	3372	Epidote	0.234308
54B32F	Early Quaternary	54B32F_4	3372	Epidote	0.234308
54B32F	Early Quaternary	54B32F_6	3357	Clinozoisite	0.127778
54B32F	Early Quaternary	54B32F_8	3378	Epidote	0.27692
54B32F	Early Quaternary	54B32F_9	3379	Epidote	0.284022
54B32F	Early Quaternary	54B32F_10	3375	Epidote	0.255614
54B32F	Early Quaternary	54B32F_11	3370	Epidote	0.220104
54B32F	Early Quaternary	54B32F_12	3376	Epidote	0.262716
54B32F	Early Quaternary	54B32F_14	3369	Epidote	0.213002
54B32F	Early Quaternary	54B32F_15	3385	Epidote	0.326634
54B32F	Early Quaternary	54B32F_16	3374	Epidote	0.248512
54B32F	Early Quaternary	54B32F_17	3366	Clinozoisite	0.191696
54B32F	Early Quaternary	54B32F_19	3386	Epidote	0.333736
54B32F	Early Quaternary	54B32F_20	3370	Epidote	0.220104
54B32F	Early Quaternary	54B32F_21	3347	Clinozoisite	0.056758
54B32F	Early Quaternary	54B32F_22	3371	Epidote	0.227206
54B32F	Early Quaternary	54B32F_25	3368	Clinozoisite	0.2059
54B32F	Early Quaternary	54B32F_26	3360	Clinozoisite	0.149084
54B32F	Early Quaternary	54B32F_27	3373	Epidote	0.24141
54B32F	Early Quaternary	54B32F_30	3377	Epidote	0.269818
54B32F	Early Quaternary	54B32F_31	3389	Epidote	0.355042
54B32F	Early Quaternary	54B32F_32	3374	Epidote	0.248512
54B32F	Early Quaternary	54B32F_34	3386	Epidote	0.333736
54B32F	Early Quaternary	54B32F_35	3379	Epidote	0.284022
54B32F	Early Quaternary	54B32F_36	3375	Epidote	0.255614

## Sheet: Table S9
Sample	Age	Grain n°	OH peak	Classification	XFe
53A3H	Middle Quaternary	53A3H_1	3371	Epidote	0.227206
53A3H	Middle Quaternary	53A3H_4	3378	Epidote	0.27692
53A3H	Middle Quaternary	53A3H_7	3374	Epidote	0.248512
53A3H	Middle Quaternary	53A3H_9	3358	Clinozoisite	0.13488
53A3H	Middle Quaternary	53A3H_10	3367	Clinozoisite	0.198798
53A3H	Middle Quaternary	53A3H_12	3373	Epidote	0.24141
53A3H	Middle Quaternary	53A3H_13	3375	Epidote	0.255614
53A3H	Middle Quaternary	53A3H_14	3370	Epidote	0.220104
53A3H	Middle Quaternary	53A3H_18	3372	Epidote	0.234308
53A3H	Middle Quaternary	53A3H_19	3382	Epidote	0.305328
53A3H	Middle Quaternary	53A3H_21	3376	Epidote	0.262716
53A3H	Middle Quaternary	53A3H_22	3370	Epidote	0.220104
53A3H	Middle Quaternary	53A3H_23	3380	Epidote	0.291124
53A3H	Middle Quaternary	53A3H_25	3356	Clinozoisite	0.120676
53A3H	Middle Quaternary	53A3H_26	3360	Clinozoisite	0.149084
53A3H	Middle Quaternary	53A3H_27	3381	Epidote	0.298226
53A3H	Middle Quaternary	53A3H_28	3380	Epidote	0.291124
53A3H	Middle Quaternary	53A3H_29	3380	Epidote	0.291124
53A3H	Middle Quaternary	53A3H_30	3373	Epidote	0.24141
53A3H	Middle Quaternary	53A3H_32	3379	Epidote	0.284022
53A3H	Middle Quaternary	53A3H_33	3371	Epidote	0.227206
53A3H	Middle Quaternary	53A3H_34	3378	Epidote	0.27692
53A3H	Middle Quaternary	53A3H_36	3379	Epidote	0.284022
53A3H	Middle Quaternary	53A3H_37	3376	Epidote	0.262716
53A3H	Middle Quaternary	53A3H_38	3362	Clinozoisite	0.163288
53A3H	Middle Quaternary	53A3H_39	3379	Epidote	0.284022
53A10F	Middle Quaternary	53A10F_4	3375	Epidote	0.255614
53A10F	Middle Quaternary	53A10F_6	3381	Epidote	0.298226
53A10F	Middle Quaternary	53A10F_7	3367	Clinozoisite	0.198798
53A10F	Middle Quaternary	53A10F_9	3381	Epidote	0.298226
53A10F	Middle Quaternary	53A10F_11	3378	Epidote	0.27692
53A10F	Middle Quaternary	53A10F_13	3377	Epidote	0.269818
53A10F	Middle Quaternary	53A10F_14	3364	Clinozoisite	0.177492
53A10F	Middle Quaternary	53A10F_15	3370	Epidote	0.220104
53A10F	Middle Quaternary	53A10F_16	3379	Epidote	0.284022
53A10F	Middle Quaternary	53A10F_17	3382	Epidote	0.305328
53A10F	Middle Quaternary	53A10F_19	3384	Epidote	0.319532
53A10F	Middle Quaternary	53A10F_22	3373	Epidote	0.24141
53A10F	Middle Quaternary	53A10F_24	3365	Clinozoisite	0.184594
53A10F	Middle Quaternary	53A10F_25	3361	Clinozoisite	0.156186
53A10F	Middle Quaternary	53A10F_26	3369	Epidote	0.213002
53A10F	Middle Quaternary	53A10F_28	3374	Epidote	0.248512
53A10F	Middle Quaternary	53A10F_29	3356	Clinozoisite	0.120676
53A10F	Middle Quaternary	53A10F_31	3358	Clinozoisite	0.13488
53A10F	Middle Quaternary	53A10F_34	3375	Epidote	0.255614
53A10F	Middle Quaternary	53A10F_35	3363	Clinozoisite	0.17039
53A10F	Middle Quaternary	53A10F_36	3375	Epidote	0.255614
53A15F	Middle Quaternary	53A15F_1	3383	Epidote	0.31243
53A15F	Middle Quaternary	53A15F_4	3389	Epidote	0.355042
53A15F	Middle Quaternary	53A15F_5	3377	Epidote	0.269818
53A15F	Middle Quaternary	53A15F_7	3379	Epidote	0.284022
53A15F	Middle Quaternary	53A15F_9	3370	Epidote	0.220104
53A15F	Middle Quaternary	53A15F_10	3377	Epidote	0.269818
53A15F	Middle Quaternary	53A15F_11	3370	Epidote	0.220104
53A15F	Middle Quaternary	53A15F_12	3371	Epidote	0.227206
53A15F	Middle Quaternary	53A15F_17	3360	Clinozoisite	0.149084
53A15F	Middle Quaternary	53A15F_18	3376	Epidote	0.262716
53A15F	Middle Quaternary	53A15F_19	3371	Epidote	0.227206
53A15F	Middle Quaternary	53A15F_24	3375	Epidote	0.255614
53A15F	Middle Quaternary	53A15F_25	3365	Clinozoisite	0.184594
53A15F	Middle Quaternary	53A15F_26	3370	Epidote	0.220104
53A15F	Middle Quaternary	53A15F_27	3373	Epidote	0.24141
53A15F	Middle Quaternary	53A15F_28	3377	Epidote	0.269818
53A15F	Middle Quaternary	53A15F_29	3372	Epidote	0.234308
53A15F	Middle Quaternary	53A15F_31	3371	Epidote	0.227206
53A15F	Middle Quaternary	53A15F_32	3385	Epidote	0.326634
53A15F	Middle Quaternary	53A15F_33	3351	Clinozoisite	0.085166
53A15F	Middle Quaternary	53A15F_34	3382	Epidote	0.305328
53A15F	Middle Quaternary	53A15F_35	3383	Epidote	0.31243
53A15F	Middle Quaternary	53A15F_36	3378	Epidote	0.27692
53A15F	Middle Quaternary	53A15F_38	3370	Epidote	0.220104
53A15F	Middle Quaternary	53A15F_40	3375	Epidote	0.255614
53A15F	Middle Quaternary	53A15F_43	3379	Epidote	0.284022
53A15F	Middle Quaternary	53A15F_45	3377	Epidote	0.269818
53A15F	Middle Quaternary	53A15F_46	3359	Clinozoisite	0.141982
53A20F	Middle Quaternary	53A20F_3	3366	Clinozoisite	0.191696
53A20F	Middle Quaternary	53A20F_5	3379	Epidote	0.284022
53A20F	Middle Quaternary	53A20F_8	3365	Clinozoisite	0.184594
53A20F	Middle Quaternary	53A20F_11	3380	Epidote	0.291124
53A20F	Middle Quaternary	53A20F_12	3371	Epidote	0.227206
53A20F	Middle Quaternary	53A20F_13	3371	Epidote	0.227206
53A20F	Middle Quaternary	53A20F_15	3354	Clinozoisite	0.106472
53A20F	Middle Quaternary	53A20F_18	3376	Epidote	0.262716
53A20F	Middle Quaternary	53A20F_20	3387	Epidote	0.340838
53A20F	Middle Quaternary	53A20F_23	3365	Clinozoisite	0.184594
53A20F	Middle Quaternary	53A20F_24	3376	Epidote	0.262716
53A20F	Middle Quaternary	53A20F_25	3365	Clinozoisite	0.184594
53A20F	Middle Quaternary	53A20F_30	3367	Clinozoisite	0.198798
53A20F	Middle Quaternary	53A20F_32	3379	Epidote	0.284022
53A20F	Middle Quaternary	53A20F_33	3377	Epidote	0.269818
53A20F	Middle Quaternary	53A20F_34	3377	Epidote	0.269818
53A20F	Middle Quaternary	53A20F_37	3387	Epidote	0.340838
53A20F	Middle Quaternary	53A20F_38	3384	Epidote	0.319532
53A20F	Middle Quaternary	53A20F_40	3376	Epidote	0.262716
53A20F	Middle Quaternary	53A20F_42	3372	Epidote	0.234308
53A27F	Middle Quaternary	53A27F_1	3378	Epidote	0.27692
53A27F	Middle Quaternary	53A27F_4	3364	Clinozoisite	0.177492
53A27F	Middle Quaternary	53A27F_6	3367	Clinozoisite	0.198798
53A27F	Middle Quaternary	53A27F_11	3360	Clinozoisite	0.149084
53A27F	Middle Quaternary	53A27F_12	3370	Epidote	0.220104
53A27F	Middle Quaternary	53A27F_13	3361	Clinozoisite	0.156186
53A27F	Middle Quaternary	53A27F_15	3363	Clinozoisite	0.17039
53A27F	Middle Quaternary	53A27F_16	3378	Epidote	0.27692
53A27F	Middle Quaternary	53A27F_21	3378	Epidote	0.27692
53A27F	Middle Quaternary	53A27F_23	3376	Epidote	0.262716
53A27F	Middle Quaternary	53A27F_25	3378	Epidote	0.27692
53A27F	Middle Quaternary	53A27F_29	3376	Epidote	0.262716
53A27F	Middle Quaternary	53A27F_31	3373	Epidote	0.24141
53A27F	Middle Quaternary	53A27F_32	3358	Clinozoisite	0.13488
53A27F	Middle Quaternary	53A27F_33	3375	Epidote	0.255614
53A27F	Middle Quaternary	53A27F_34	3375	Epidote	0.255614
53A27F	Middle Quaternary	53A27F_35	3365	Clinozoisite	0.184594
53A27F	Middle Quaternary	53A27F_37	3376	Epidote	0.262716
53A27F	Middle Quaternary	53A27F_39	3386	Epidote	0.333736
53A27F	Middle Quaternary	53A27F_40	3373	Epidote	0.24141
53A27F	Middle Quaternary	53A27F_42	3369	Epidote	0.213002
53A27F	Middle Quaternary	53A27F_43	3376	Epidote	0.262716
53A27F	Middle Quaternary	53A27F_44	3384	Epidote	0.319532
53A32F	Early Quaternary	53A32F_1	3378	Epidote	0.27692
53A32F	Early Quaternary	53A32F_2	3374	Epidote	0.248512
53A32F	Early Quaternary	53A32F_3	3383	Epidote	0.31243
53A32F	Early Quaternary	53A32F_4	3360	Clinozoisite	0.149084
53A32F	Early Quaternary	53A32F_5	3374	Epidote	0.248512
53A32F	Early Quaternary	53A32F_6	3367	Clinozoisite	0.198798
53A32F	Early Quaternary	53A32F_7	3371	Epidote	0.227206
53A32F	Early Quaternary	53A32F_8	3369	Epidote	0.213002
53A32F	Early Quaternary	53A32F_13	3373	Epidote	0.24141
53A32F	Early Quaternary	53A32F_15	3378	Epidote	0.27692
53A32F	Early Quaternary	53A32F_17	3380	Epidote	0.291124
53A32F	Early Quaternary	53A32F_18	3383	Epidote	0.31243
53A32F	Early Quaternary	53A32F_20	3364	Clinozoisite	0.177492
53A32F	Early Quaternary	53A32F_23	3359	Clinozoisite	0.141982
53A32F	Early Quaternary	53A32F_24	3390	Epidote	0.362144
53A32F	Early Quaternary	53A32F_26	3379	Epidote	0.284022
53A32F	Early Quaternary	53A32F_31	3391	Epidote	0.369246
53A32F	Early Quaternary	53A32F_33	3383	Epidote	0.31243
53A32F	Early Quaternary	53A32F_37	3370	Epidote	0.220104
53A38F	Early Quaternary	53A38F_3	3360	Clinozoisite	0.149084
53A38F	Early Quaternary	53A38F_5	3386	Epidote	0.333736
53A38F	Early Quaternary	53A38F_6	3366	Clinozoisite	0.191696
53A38F	Early Quaternary	53A38F_7	3382	Epidote	0.305328
53A38F	Early Quaternary	53A38F_10	3364	Clinozoisite	0.177492
53A38F	Early Quaternary	53A38F_11	3368	Clinozoisite	0.2059
53A38F	Early Quaternary	53A38F_13	3364	Clinozoisite	0.177492
53A38F	Early Quaternary	53A38F_14	3367	Clinozoisite	0.198798
53A38F	Early Quaternary	53A38F_15	3376	Epidote	0.262716
53A38F	Early Quaternary	53A38F_16	3370	Epidote	0.220104
53A38F	Early Quaternary	53A38F_18	3368	Clinozoisite	0.2059
53A38F	Early Quaternary	53A38F_20	3364	Clinozoisite	0.177492
53A38F	Early Quaternary	53A38F_21	3367	Clinozoisite	0.198798
53A38F	Early Quaternary	53A38F_22	3378	Epidote	0.27692
53A38F	Early Quaternary	53A38F_23	3378	Epidote	0.27692
53A38F	Early Quaternary	53A38F_24	3365	Clinozoisite	0.184594
53A38F	Early Quaternary	53A38F_25	3363	Clinozoisite	0.17039
53A38F	Early Quaternary	53A38F_26	3360	Clinozoisite	0.149084
53A38F	Early Quaternary	53A38F_27	3379	Epidote	0.284022
53A38F	Early Quaternary	53A38F_29	3371	Epidote	0.227206
53A38F	Early Quaternary	53A38F_31	3375	Epidote	0.255614
53A38F	Early Quaternary	53A38F_32	3366	Clinozoisite	0.191696
53A38F	Early Quaternary	53A38F_34	3380	Epidote	0.291124
53A38F	Early Quaternary	53A38F_35	3363	Clinozoisite	0.17039

## Sheet: Table S10
Sample	Age	Grain n°	OH peak	Classification	XFe
52B8F	Middle Quaternary	52B8F_1	3353	Clinozoisite	0.09937
52B8F	Middle Quaternary	52B8F_3	3355	Clinozoisite	0.113574
52B8F	Middle Quaternary	52B8F_4	3362	Clinozoisite	0.163288
52B8F	Middle Quaternary	52B8F_6	3355	Clinozoisite	0.113574
52B8F	Middle Quaternary	52B8F_7	3361	Clinozoisite	0.156186
52B8F	Middle Quaternary	52B8F_10	3354	Clinozoisite	0.106472
52B8F	Middle Quaternary	52B8F_13	3366	Clinozoisite	0.191696
52B8F	Middle Quaternary	52B8F_14	3351	Clinozoisite	0.085166
52B8F	Middle Quaternary	52B8F_15	3369	Epidote	0.213002
52B8F	Middle Quaternary	52B8F_16	3381	Epidote	0.298226
52B8F	Middle Quaternary	52B8F_17	3375	Epidote	0.255614
52B8F	Middle Quaternary	52B8F_18	3385	Epidote	0.326634
52B8F	Middle Quaternary	52B8F_23	3371	Epidote	0.227206
52B8F	Middle Quaternary	52B8F_24	3364	Clinozoisite	0.177492
52B8F	Middle Quaternary	52B8F_25	3384	Epidote	0.319532
52B8F	Middle Quaternary	52B8F_28	3377	Epidote	0.269818
52B8F	Middle Quaternary	52B8F_30	3371	Epidote	0.227206
52B8F	Middle Quaternary	52B8F_31	3360	Clinozoisite	0.149084
52B8F	Middle Quaternary	52B8F_33	3351	Clinozoisite	0.085166
52B8F	Middle Quaternary	52B8F_35	3364	Clinozoisite	0.177492
52B8F	Middle Quaternary	52B8F_36	3369	Epidote	0.213002
52B8F	Middle Quaternary	52B8F_37	3366	Clinozoisite	0.191696
52B8F	Middle Quaternary	52B8F_38	3353	Clinozoisite	0.09937
52B8F	Middle Quaternary	52B8F_39	3352	Clinozoisite	0.092268
52B8F	Middle Quaternary	52B8F_40	3387	Epidote	0.340838
52B8F	Middle Quaternary	52B8F_42	3380	Epidote	0.291124
52B8F	Middle Quaternary	52B8F_43	3370	Epidote	0.220104
52B8F	Middle Quaternary	52B8F_44	3371	Epidote	0.227206
52B8F	Middle Quaternary	52B8F_46	3353	Clinozoisite	0.09937
52B8F	Middle Quaternary	52B8F_47	3377	Epidote	0.269818
52B8F	Middle Quaternary	52B8F_48	3366	Clinozoisite	0.191696
52B18F	Middle Quaternary	52B18F_3	3377	Epidote	0.269818
52B18F	Middle Quaternary	52B18F_5	3375	Epidote	0.255614
52B18F	Middle Quaternary	52B18F_8	3376	Epidote	0.262716
52B18F	Middle Quaternary	52B18F_9	3377	Epidote	0.269818
52B18F	Middle Quaternary	52B18F_10	3388	Epidote	0.34794
52B18F	Middle Quaternary	52B18F_12	3364	Clinozoisite	0.177492
52B18F	Middle Quaternary	52B18F_13	3389	Epidote	0.355042
52B18F	Middle Quaternary	52B18F_14	3372	Epidote	0.234308
52B18F	Middle Quaternary	52B18F_16	3379	Epidote	0.284022
52B18F	Middle Quaternary	52B18F_17	3378	Epidote	0.27692
52B18F	Middle Quaternary	52B18F_19	3358	Clinozoisite	0.13488
52B18F	Middle Quaternary	52B18F_20	3377	Epidote	0.269818
52B18F	Middle Quaternary	52B18F_21	3377	Epidote	0.269818
52B18F	Middle Quaternary	52B18F_22	3368	Clinozoisite	0.2059
52B18F	Middle Quaternary	52B18F_23	3359	Clinozoisite	0.141982
52B18F	Middle Quaternary	52B18F_24	3357	Clinozoisite	0.127778
52B18F	Middle Quaternary	52B18F_25	3363	Clinozoisite	0.17039
52B18F	Middle Quaternary	52B18F_26	3375	Epidote	0.255614
52B18F	Middle Quaternary	52B18F_28	3379	Epidote	0.284022
52B18F	Middle Quaternary	52B18F_29	3371	Epidote	0.227206
52B18F	Middle Quaternary	52B18F_30	3380	Epidote	0.291124
52B18F	Middle Quaternary	52B18F_31	3378	Epidote	0.27692
52B18F	Middle Quaternary	52B18F_32	3366	Clinozoisite	0.191696
52B18F	Middle Quaternary	52B18F_33	3379	Epidote	0.284022
52B18F	Middle Quaternary	52B18F_34	3355	Clinozoisite	0.113574
52B18F	Middle Quaternary	52B18F_35	3370	Epidote	0.220104
52B18F	Middle Quaternary	52B18F_37	3373	Epidote	0.24141
52B18F	Middle Quaternary	52B18F_38	3381	Epidote	0.298226
52B18F	Middle Quaternary	52B18F_39	3378	Epidote	0.27692
52B18F	Middle Quaternary	52B18F_41	3380	Epidote	0.291124
52B18F	Middle Quaternary	52B18F_42	3368	Clinozoisite	0.2059
52B22F	Middle Quaternary	52B22F_2	3358	Clinozoisite	0.13488
52B22F	Middle Quaternary	52B22F_3	3382	Epidote	0.305328
52B22F	Middle Quaternary	52B22F_4	3356	Clinozoisite	0.120676
52B22F	Middle Quaternary	52B22F_5	3374	Epidote	0.248512
52B22F	Middle Quaternary	52B22F_6	3371	Epidote	0.227206
52B22F	Middle Quaternary	52B22F_8	3369	Epidote	0.213002
52B22F	Middle Quaternary	52B22F_9	3357	Clinozoisite	0.127778
52B22F	Middle Quaternary	52B22F_10	3369	Epidote	0.213002
52B22F	Middle Quaternary	52B22F_11	3372	Epidote	0.234308
52B22F	Middle Quaternary	52B22F_12	3396	Epidote	0.404756
52B22F	Middle Quaternary	52B22F_13	3363	Clinozoisite	0.17039
52B22F	Middle Quaternary	52B22F_15	3379	Epidote	0.284022
52B22F	Middle Quaternary	52B22F_16	3363	Clinozoisite	0.17039
52B22F	Middle Quaternary	52B22F_17	3387	Epidote	0.340838
52B22F	Middle Quaternary	52B22F_18	3375	Epidote	0.255614
52B22F	Middle Quaternary	52B22F_19	3355	Clinozoisite	0.113574
52B22F	Middle Quaternary	52B22F_20	3370	Epidote	0.220104
52B22F	Middle Quaternary	52B22F_21	3390	Epidote	0.362144
52B22F	Middle Quaternary	52B22F_22	3357	Clinozoisite	0.127778
52B22F	Middle Quaternary	52B22F_24	3371	Epidote	0.227206
52B22F	Middle Quaternary	52B22F_25	3373	Epidote	0.24141
52B22F	Middle Quaternary	52B22F_28	3357	Clinozoisite	0.127778
52B22F	Middle Quaternary	52B22F_30	3376	Epidote	0.262716
52B22F	Middle Quaternary	52B22F_31	3388	Epidote	0.34794
52B22F	Middle Quaternary	52B22F_32	3377	Epidote	0.269818
52B22F	Middle Quaternary	52B22F_33	3381	Epidote	0.298226
52B30F	Middle Quaternary	52B30F_1	3362	Clinozoisite	0.163288
52B30F	Middle Quaternary	52B30F_2	3361	Clinozoisite	0.156186
52B30F	Middle Quaternary	52B30F_3	3383	Epidote	0.31243
52B30F	Middle Quaternary	52B30F_5	3379	Epidote	0.284022
52B30F	Middle Quaternary	52B30F_6	3360	Clinozoisite	0.149084
52B30F	Middle Quaternary	52B30F_7	3371	Epidote	0.227206
52B30F	Middle Quaternary	52B30F_8	3385	Epidote	0.326634
52B30F	Middle Quaternary	52B30F_9	3380	Epidote	0.291124
52B30F	Middle Quaternary	52B30F_10	3381	Epidote	0.298226
52B30F	Middle Quaternary	52B30F_11	3367	Clinozoisite	0.198798
52B30F	Middle Quaternary	52B30F_13	3385	Epidote	0.326634
52B30F	Middle Quaternary	52B30F_14	3377	Epidote	0.269818
52B30F	Middle Quaternary	52B30F_15	3379	Epidote	0.284022
52B30F	Middle Quaternary	52B30F_16	3370	Epidote	0.220104
52B30F	Middle Quaternary	52B30F_17	3372	Epidote	0.234308
52B30F	Middle Quaternary	52B30F_18	3384	Epidote	0.319532
52B30F	Middle Quaternary	52B30F_19	3392	Epidote	0.376348
52B30F	Middle Quaternary	52B30F_20	3362	Clinozoisite	0.163288
52B30F	Middle Quaternary	52B30F_23	3386	Epidote	0.333736
52B30F	Middle Quaternary	52B30F_24	3378	Epidote	0.27692
52B30F	Middle Quaternary	52B30F_25	3364	Clinozoisite	0.177492
52B30F	Middle Quaternary	52B30F_26	3374	Epidote	0.248512
52B30F	Middle Quaternary	52B30F_27	3387	Epidote	0.340838
52B30F	Middle Quaternary	52B30F_28	3373	Epidote	0.24141
52B30F	Middle Quaternary	52B30F_29	3366	Clinozoisite	0.191696
52B30F	Middle Quaternary	52B30F_30	3361	Clinozoisite	0.156186
52B30F	Middle Quaternary	52B30F_32	3375	Epidote	0.255614
52B30F	Middle Quaternary	52B30F_33	3381	Epidote	0.298226
52B30F	Middle Quaternary	52B30F_35	3375	Epidote	0.255614
52B30F	Middle Quaternary	52B30F_38	3380	Epidote	0.291124
52B30F	Middle Quaternary	52B30F_42	3367	Clinozoisite	0.198798
52B30F	Middle Quaternary	52B30F_43	3357	Clinozoisite	0.127778
52B38F	Early Quaternary	52B38F_1	3374	Epidote	0.248512
52B38F	Early Quaternary	52B38F_2	3371	Epidote	0.227206
52B38F	Early Quaternary	52B38F_4	3361	Clinozoisite	0.156186
52B38F	Early Quaternary	52B38F_6	3381	Epidote	0.298226
52B38F	Early Quaternary	52B38F_8	3373	Epidote	0.24141
52B38F	Early Quaternary	52B38F_9	3385	Epidote	0.326634
52B38F	Early Quaternary	52B38F_10	3378	Epidote	0.27692
52B38F	Early Quaternary	52B38F_11	3387	Epidote	0.340838
52B38F	Early Quaternary	52B38F_13	3363	Clinozoisite	0.17039
52B38F	Early Quaternary	52B38F_14	3377	Epidote	0.269818
52B38F	Early Quaternary	52B38F_15	3386	Epidote	0.333736
52B38F	Early Quaternary	52B38F_17	3369	Epidote	0.213002
52B38F	Early Quaternary	52B38F_18	3370	Epidote	0.220104
52B38F	Early Quaternary	52B38F_19	3387	Epidote	0.340838
52B38F	Early Quaternary	52B38F_21	3381	Epidote	0.298226
52B38F	Early Quaternary	52B38F_24	3367	Clinozoisite	0.198798
52B38F	Early Quaternary	52B38F_25	3359	Clinozoisite	0.141982
52B38F	Early Quaternary	52B38F_26	3376	Epidote	0.262716
52B38F	Early Quaternary	52B38F_27	3396	Epidote	0.404756
52B38F	Early Quaternary	52B38F_28	3360	Clinozoisite	0.149084
52B38F	Early Quaternary	52B38F_29	3390	Epidote	0.362144
52B38F	Early Quaternary	52B38F_30	3390	Epidote	0.362144
52B38F	Early Quaternary	52B38F_32	3371	Epidote	0.227206
52B38F	Early Quaternary	52B38F_33	3372	Epidote	0.234308
52B38F	Early Quaternary	52B38F_34	3372	Epidote	0.234308
52B38F	Early Quaternary	52B38F_35	3374	Epidote	0.248512

## Sheet: Table S11
Sample	Age	Grain n°	OH peak	Classification	XFe
49A2H	Middle Quaternary	49A2H_1	3373	Epidote	0.24141
49A2H	Middle Quaternary	49A2H_2	3360	Clinozoisite	0.149084
49A2H	Middle Quaternary	49A2H_3	3374	Epidote	0.248512
49A2H	Middle Quaternary	49A2H_4	3372	Epidote	0.234308
49A2H	Middle Quaternary	49A2H_5	3358	Clinozoisite	0.13488
49A2H	Middle Quaternary	49A2H_6	3379	Epidote	0.284022
49A2H	Middle Quaternary	49A2H_9	3371	Epidote	0.227206
49A2H	Middle Quaternary	49A2H_13	3375	Epidote	0.255614
49A2H	Middle Quaternary	49A2H_15	3371	Epidote	0.227206
49A2H	Middle Quaternary	49A2H_17	3377	Epidote	0.269818
49A2H	Middle Quaternary	49A2H_19	3360	Clinozoisite	0.149084
49A2H	Middle Quaternary	49A2H_20	3373	Epidote	0.24141
49A2H	Middle Quaternary	49A2H_21	3378	Epidote	0.27692
49A2H	Middle Quaternary	49A2H_22	3356	Clinozoisite	0.120676
49A2H	Middle Quaternary	49A2H_24	3364	Clinozoisite	0.177492
49A2H	Middle Quaternary	49A2H_26	3365	Clinozoisite	0.184594
49A2H	Middle Quaternary	49A2H_29	3377	Epidote	0.269818
49A2H	Middle Quaternary	49A2H_30	3384	Epidote	0.319532
49A2H	Middle Quaternary	49A2H_31	3358	Clinozoisite	0.13488
49A2H	Middle Quaternary	49A2H_32	3378	Epidote	0.27692
49A2H	Middle Quaternary	49A2H_33	3386	Epidote	0.333736
49A2H	Middle Quaternary	49A2H_35	3375	Epidote	0.255614
49A2H	Middle Quaternary	49A2H_36	3381	Epidote	0.298226
49A2H	Middle Quaternary	49A2H_37	3373	Epidote	0.24141
49A2H	Middle Quaternary	49A2H_38	3357	Clinozoisite	0.127778
49A2H	Middle Quaternary	49A2H_39	3368	Clinozoisite	0.2059
49A5H	Middle Quaternary	49A5H_1	3373	Epidote	0.24141
49A5H	Middle Quaternary	49A5H_2	3377	Epidote	0.269818
49A5H	Middle Quaternary	49A5H_3	3391	Epidote	0.369246
49A5H	Middle Quaternary	49A5H_4	3368	Clinozoisite	0.2059
49A5H	Middle Quaternary	49A5H_5	3378	Epidote	0.27692
49A5H	Middle Quaternary	49A5H_6	3366	Clinozoisite	0.191696
49A5H	Middle Quaternary	49A5H_8	3366	Clinozoisite	0.191696
49A5H	Middle Quaternary	49A5H_9	3372	Epidote	0.234308
49A5H	Middle Quaternary	49A5H_10	3377	Epidote	0.269818
49A5H	Middle Quaternary	49A5H_11	3379	Epidote	0.284022
49A5H	Middle Quaternary	49A5H_12	3361	Clinozoisite	0.156186
49A5H	Middle Quaternary	49A5H_13	3364	Clinozoisite	0.177492
49A5H	Middle Quaternary	49A5H_15	3369	Epidote	0.213002
49A5H	Middle Quaternary	49A5H_16	3373	Epidote	0.24141
49A5H	Middle Quaternary	49A5H_17	3365	Clinozoisite	0.184594
49A5H	Middle Quaternary	49A5H_18	3374	Epidote	0.248512
49A5H	Middle Quaternary	49A5H_20	3358	Clinozoisite	0.13488
49A5H	Middle Quaternary	49A5H_22	3379	Epidote	0.284022
49A5H	Middle Quaternary	49A5H_23	3367	Clinozoisite	0.198798
49A5H	Middle Quaternary	49A5H_24	3376	Epidote	0.262716
49A5H	Middle Quaternary	49A5H_25	3363	Clinozoisite	0.17039
49A5H	Middle Quaternary	49A5H_27	3370	Epidote	0.220104
49A5H	Middle Quaternary	49A5H_28	3370	Epidote	0.220104
49A5H	Middle Quaternary	49A5H_29	3367	Clinozoisite	0.198798
49A5H	Middle Quaternary	49A5H_30	3377	Epidote	0.269818
49A5H	Middle Quaternary	49A5H_31	3367	Clinozoisite	0.198798
49A5H	Middle Quaternary	49A5H_32	3397	Epidote	0.411858
49A5H	Middle Quaternary	49A5H_33	3388	Epidote	0.34794
49A5H	Middle Quaternary	49A5H_35	3360	Clinozoisite	0.149084
49A5H	Middle Quaternary	49A5H_37	3376	Epidote	0.262716
49A5H	Middle Quaternary	49A5H_38	3390	Epidote	0.362144
49A5H	Middle Quaternary	49A5H_39	3377	Epidote	0.269818
49A5H	Middle Quaternary	49A5H_40	3376	Epidote	0.262716
49A5H	Middle Quaternary	49A5H_41	3386	Epidote	0.333736
49A5H	Middle Quaternary	49A5H_42	3381	Epidote	0.298226
49A5H	Middle Quaternary	49A5H_43	3362	Clinozoisite	0.163288
49A5H	Middle Quaternary	49A5H_45	3388	Epidote	0.34794
49A5H	Middle Quaternary	49A5H_48	3390	Epidote	0.362144
49A5H	Middle Quaternary	49A5H_49	3374	Epidote	0.248512
49A5H	Middle Quaternary	49A5H_50	3372	Epidote	0.234308
49A5H	Middle Quaternary	49A5H_51	3373	Epidote	0.24141
49A5H	Middle Quaternary	49A5H_52	3376	Epidote	0.262716
49A8H	Early Quaternary	49A8H_1	3387	Epidote	0.340838
49A8H	Early Quaternary	49A8H_2	3371	Epidote	0.227206
49A8H	Early Quaternary	49A8H_3	3379	Epidote	0.284022
49A8H	Early Quaternary	49A8H_4	3376	Epidote	0.262716
49A8H	Early Quaternary	49A8H_5	3381	Epidote	0.298226
49A8H	Early Quaternary	49A8H_6	3363	Clinozoisite	0.17039
49A8H	Early Quaternary	49A8H_7	3362	Clinozoisite	0.163288
49A8H	Early Quaternary	49A8H_8	3375	Epidote	0.255614
49A8H	Early Quaternary	49A8H_9	3370	Epidote	0.220104
49A8H	Early Quaternary	49A8H_10	3375	Epidote	0.255614
49A8H	Early Quaternary	49A8H_14	3362	Clinozoisite	0.163288
49A8H	Early Quaternary	49A8H_15	3368	Clinozoisite	0.2059
49A8H	Early Quaternary	49A8H_16	3374	Epidote	0.248512
49A8H	Early Quaternary	49A8H_17	3381	Epidote	0.298226
49A8H	Early Quaternary	49A8H_18	3373	Epidote	0.24141
49A8H	Early Quaternary	49A8H_19	3384	Epidote	0.319532
49A8H	Early Quaternary	49A8H_20	3367	Clinozoisite	0.198798
49A8H	Early Quaternary	49A8H_21	3367	Clinozoisite	0.198798
49A8H	Early Quaternary	49A8H_22	3378	Epidote	0.27692
49A8H	Early Quaternary	49A8H_23	3378	Epidote	0.27692
49A8H	Early Quaternary	49A8H_24	3386	Epidote	0.333736
49A8H	Early Quaternary	49A8H_25	3378	Epidote	0.27692
49A8H	Early Quaternary	49A8H_27	3368	Clinozoisite	0.2059
49A8H	Early Quaternary	49A8H_29	3386	Epidote	0.333736
49A8H	Early Quaternary	49A8H_30	3380	Epidote	0.291124
49A8H	Early Quaternary	49A8H_31	3363	Clinozoisite	0.17039
49A8H	Early Quaternary	49A8H_33	3385	Epidote	0.326634
49A8H	Early Quaternary	49A8H_34	3382	Epidote	0.305328
49A8H	Early Quaternary	49A8H_35	3373	Epidote	0.24141
49A8H	Early Quaternary	49A8H_36	3378	Epidote	0.27692
49A8H	Early Quaternary	49A8H_38	3377	Epidote	0.269818
49A8H	Early Quaternary	49A8H_40	3368	Clinozoisite	0.2059
49A8H	Early Quaternary	49A8H_41	3387	Epidote	0.340838
49A8H	Early Quaternary	49A8H_43	3384	Epidote	0.319532
49A8H	Early Quaternary	49A8H_44	3382	Epidote	0.305328
49A8H	Early Quaternary	49A8H_45	3387	Epidote	0.340838
49A8H	Early Quaternary	49A8H_46	3383	Epidote	0.31243
49A8H	Early Quaternary	49A8H_47	3373	Epidote	0.24141
49A8H	Early Quaternary	49A8H_48	3391	Epidote	0.369246
49A16F	Early Quaternary	49A16F_1	3384	Epidote	0.319532
49A16F	Early Quaternary	49A16F_3	3370	Epidote	0.220104
49A16F	Early Quaternary	49A16F_4	3353	Clinozoisite	0.09937
49A16F	Early Quaternary	49A16F_5	3369	Epidote	0.213002
49A16F	Early Quaternary	49A16F_6	3368	Clinozoisite	0.2059
49A16F	Early Quaternary	49A16F_7	3376	Epidote	0.262716
49A16F	Early Quaternary	49A16F_8	3370	Epidote	0.220104
49A16F	Early Quaternary	49A16F_10	3359	Clinozoisite	0.141982
49A16F	Early Quaternary	49A16F_12	3371	Epidote	0.227206
49A16F	Early Quaternary	49A16F_13	3370	Epidote	0.220104
49A16F	Early Quaternary	49A16F_14	3369	Epidote	0.213002
49A16F	Early Quaternary	49A16F_17	3388	Epidote	0.34794
49A16F	Early Quaternary	49A16F_18	3389	Epidote	0.355042
49A16F	Early Quaternary	49A16F_19	3380	Epidote	0.291124
49A16F	Early Quaternary	49A16F_20	3373	Epidote	0.24141
49A16F	Early Quaternary	49A16F_21	3374	Epidote	0.248512
49A16F	Early Quaternary	49A16F_22	3364	Clinozoisite	0.177492
49A16F	Early Quaternary	49A16F_23	3374	Epidote	0.248512
49A16F	Early Quaternary	49A16F_25	3357	Clinozoisite	0.127778
49A16F	Early Quaternary	49A16F_26	3391	Epidote	0.369246
49A16F	Early Quaternary	49A16F_27	3383	Epidote	0.31243
49A16F	Early Quaternary	49A16F_28	3387	Epidote	0.340838
49A16F	Early Quaternary	49A16F_30	3369	Epidote	0.213002
49A16F	Early Quaternary	49A16F_31	3361	Clinozoisite	0.156186
49A16F	Early Quaternary	49A16F_33	3363	Clinozoisite	0.17039
49A16F	Early Quaternary	49A16F_34	3362	Clinozoisite	0.163288
49A16F	Early Quaternary	49A16F_35	3371	Epidote	0.227206
49A16F	Early Quaternary	49A16F_36	3383	Epidote	0.31243
49A16F	Early Quaternary	49A16F_37	3371	Epidote	0.227206
49A16F	Early Quaternary	49A16F_38	3369	Epidote	0.213002
49A16F	Early Quaternary	49A16F_39	3364	Clinozoisite	0.177492
49A16F	Early Quaternary	49A16F_40	3388	Epidote	0.34794
49A16F	Early Quaternary	49A16F_41	3385	Epidote	0.326634
49A16F	Early Quaternary	49A16F_42	3374	Epidote	0.248512
49A16F	Early Quaternary	49A16F_43	3370	Epidote	0.220104
49A16F	Early Quaternary	49A16F_44	3366	Clinozoisite	0.191696
49A16F	Early Quaternary	49A16F_45	3389	Epidote	0.355042
49A16F	Early Quaternary	49A16F_46	3367	Clinozoisite	0.198798
49A29F	Early Quaternary	49A29F_2	3360	Clinozoisite	0.149084
49A29F	Early Quaternary	49A29F_3	3373	Epidote	0.24141
49A29F	Early Quaternary	49A29F_4	3373	Epidote	0.24141
49A29F	Early Quaternary	49A29F_6	3384	Epidote	0.319532
49A29F	Early Quaternary	49A29F_7	3361	Clinozoisite	0.156186
49A29F	Early Quaternary	49A29F_9	3366	Clinozoisite	0.191696
49A29F	Early Quaternary	49A29F_10	3383	Epidote	0.31243
49A29F	Early Quaternary	49A29F_14	3359	Clinozoisite	0.141982
49A29F	Early Quaternary	49A29F_15	3362	Clinozoisite	0.163288
49A29F	Early Quaternary	49A29F_16	3361	Clinozoisite	0.156186
49A29F	Early Quaternary	49A29F_17	3379	Epidote	0.284022
49A29F	Early Quaternary	49A29F_19	3365	Clinozoisite	0.184594
49A29F	Early Quaternary	49A29F_20	3371	Epidote	0.227206
49A29F	Early Quaternary	49A29F_21	3375	Epidote	0.255614
49A29F	Early Quaternary	49A29F_22	3375	Epidote	0.255614
49A29F	Early Quaternary	49A29F_23	3375	Epidote	0.255614
49A29F	Early Quaternary	49A29F_24	3384	Epidote	0.319532
49A29F	Early Quaternary	49A29F_27	3366	Clinozoisite	0.191696
49A29F	Early Quaternary	49A29F_28	3377	Epidote	0.269818
49A29F	Early Quaternary	49A29F_30	3358	Clinozoisite	0.13488
49A29F	Early Quaternary	49A29F_31	3352	Clinozoisite	0.092268
49A29F	Early Quaternary	49A29F_32	3369	Epidote	0.213002
49A29F	Early Quaternary	49A29F_33	3358	Clinozoisite	0.13488
49A29F	Early Quaternary	49A29F_34	3376	Epidote	0.262716
49A29F	Early Quaternary	49A29F_35	3385	Epidote	0.326634
49A29F	Early Quaternary	49A29F_36	3379	Epidote	0.284022
49A29F	Early Quaternary	49A29F_37	3358	Clinozoisite	0.13488
49A29F	Early Quaternary	49A29F_39	3367	Clinozoisite	0.198798
49A29F	Early Quaternary	49A29F_40	3381	Epidote	0.298226
49A37F	Early Quaternary	49A37F_2	3362	Clinozoisite	0.163288
49A37F	Early Quaternary	49A37F_4	3374	Epidote	0.248512
49A37F	Early Quaternary	49A37F_6	3388	Epidote	0.34794
49A37F	Early Quaternary	49A37F_8	3355	Clinozoisite	0.113574
49A37F	Early Quaternary	49A37F_9	3375	Epidote	0.255614
49A37F	Early Quaternary	49A37F_12	3368	Clinozoisite	0.2059
49A37F	Early Quaternary	49A37F_15	3382	Epidote	0.305328
49A37F	Early Quaternary	49A37F_17	3376	Epidote	0.262716
49A37F	Early Quaternary	49A37F_19	3359	Clinozoisite	0.141982
49A37F	Early Quaternary	49A37F_21	3380	Epidote	0.291124
49A37F	Early Quaternary	49A37F_22	3369	Epidote	0.213002
49A37F	Early Quaternary	49A37F_23	3377	Epidote	0.269818
49A37F	Early Quaternary	49A37F_24	3373	Epidote	0.24141
49A37F	Early Quaternary	49A37F_25	3372	Epidote	0.234308
49A37F	Early Quaternary	49A37F_26	3365	Clinozoisite	0.184594
49A37F	Early Quaternary	49A37F_27	3362	Clinozoisite	0.163288
49A37F	Early Quaternary	49A37F_28	3368	Clinozoisite	0.2059
49A37F	Early Quaternary	49A37F_29	3380	Epidote	0.291124
49A37F	Early Quaternary	49A37F_30	3399	Epidote	0.426062
49A37F	Early Quaternary	49A37F_32	3370	Epidote	0.220104
49A37F	Early Quaternary	49A37F_33	3379	Epidote	0.284022
49A37F	Early Quaternary	49A37F_36	3367	Clinozoisite	0.198798
49A37F	Early Quaternary	49A37F_40	3381	Epidote	0.298226
49A37F	Early Quaternary	49A37F_44	3390	Epidote	0.362144
49A37F	Early Quaternary	49A37F_45	3375	Epidote	0.255614
49A37F	Early Quaternary	49A37F_46	3385	Epidote	0.326634
49A37F	Early Quaternary	49A37F_48	3355	Clinozoisite	0.113574
49A37F	Early Quaternary	49A37F_49	3382	Epidote	0.305328

## Sheet: Table S12
Sample	Age	Grain n°	OH peak	Classification	XFe
51A4H	Middle Quaternary	51A4H_1	3368	Clinozoisite	0.2059
51A4H	Middle Quaternary	51A4H_2	3389	Epidote	0.355042
51A4H	Middle Quaternary	51A4H_3	3371	Epidote	0.227206
51A4H	Middle Quaternary	51A4H_6	3374	Epidote	0.248512
51A4H	Middle Quaternary	51A4H_8	3380	Epidote	0.291124
51A4H	Middle Quaternary	51A4H_9	3370	Epidote	0.220104
51A4H	Middle Quaternary	51A4H_11	3366	Clinozoisite	0.191696
51A4H	Middle Quaternary	51A4H_12	3365	Clinozoisite	0.184594
51A4H	Middle Quaternary	51A4H_14	3379	Epidote	0.284022
51A4H	Middle Quaternary	51A4H_15	3382	Epidote	0.305328
51A4H	Middle Quaternary	51A4H_16	3374	Epidote	0.248512
51A4H	Middle Quaternary	51A4H_17	3377	Epidote	0.269818
51A4H	Middle Quaternary	51A4H_18	3378	Epidote	0.27692
51A4H	Middle Quaternary	51A4H_19	3380	Epidote	0.291124
51A4H	Middle Quaternary	51A4H_20	3381	Epidote	0.298226
51A4H	Middle Quaternary	51A4H_21	3372	Epidote	0.234308
51A4H	Middle Quaternary	51A4H_23	3360	Clinozoisite	0.149084
51A4H	Middle Quaternary	51A4H_24	3394	Epidote	0.390552
51A4H	Middle Quaternary	51A4H_25	3361	Clinozoisite	0.156186
51A4H	Middle Quaternary	51A4H_26	3381	Epidote	0.298226
51A4H	Middle Quaternary	51A4H_27	3378	Epidote	0.27692
51A4H	Middle Quaternary	51A4H_29	3367	Clinozoisite	0.198798
51A4H	Middle Quaternary	51A4H_30	3365	Clinozoisite	0.184594
51A4H	Middle Quaternary	51A4H_32	3368	Clinozoisite	0.2059
51A4H	Middle Quaternary	51A4H_34	3382	Epidote	0.305328
51A4H	Middle Quaternary	51A4H_36	3378	Epidote	0.27692
51A4H	Middle Quaternary	51A4H_38	3379	Epidote	0.284022
51A4H	Middle Quaternary	51A4H_39	3361	Clinozoisite	0.156186
51A6H	Middle Quaternary	51A6H_1	3364	Clinozoisite	0.177492
51A6H	Middle Quaternary	51A6H_2	3387	Epidote	0.340838
51A6H	Middle Quaternary	51A6H_3	3378	Epidote	0.27692
51A6H	Middle Quaternary	51A6H_4	3378	Epidote	0.27692
51A6H	Middle Quaternary	51A6H_5	3373	Epidote	0.24141
51A6H	Middle Quaternary	51A6H_6	3375	Epidote	0.255614
51A6H	Middle Quaternary	51A6H_7	3377	Epidote	0.269818
51A6H	Middle Quaternary	51A6H_8	3378	Epidote	0.27692
51A6H	Middle Quaternary	51A6H_10	3375	Epidote	0.255614
51A6H	Middle Quaternary	51A6H_11	3370	Epidote	0.220104
51A6H	Middle Quaternary	51A6H_13	3363	Clinozoisite	0.17039
51A6H	Middle Quaternary	51A6H_15	3362	Clinozoisite	0.163288
51A6H	Middle Quaternary	51A6H_17	3376	Epidote	0.262716
51A6H	Middle Quaternary	51A6H_18	3376	Epidote	0.262716
51A6H	Middle Quaternary	51A6H_20	3364	Clinozoisite	0.177492
51A6H	Middle Quaternary	51A6H_21	3373	Epidote	0.24141
51A6H	Middle Quaternary	51A6H_22	3380	Epidote	0.291124
51A6H	Middle Quaternary	51A6H_23	3370	Epidote	0.220104
51A6H	Middle Quaternary	51A6H_25	3366	Clinozoisite	0.191696
51A6H	Middle Quaternary	51A6H_26	3386	Epidote	0.333736
51A7H	Middle Quaternary	51A7H_3	3367	Clinozoisite	0.198798
51A7H	Middle Quaternary	51A7H_4	3363	Clinozoisite	0.17039
51A7H	Middle Quaternary	51A7H_5	3373	Epidote	0.24141
51A7H	Middle Quaternary	51A7H_8	3378	Epidote	0.27692
51A7H	Middle Quaternary	51A7H_9	3374	Epidote	0.248512
51A7H	Middle Quaternary	51A7H_10	3351	Clinozoisite	0.085166
51A7H	Middle Quaternary	51A7H_12	3365	Clinozoisite	0.184594
51A7H	Middle Quaternary	51A7H_13	3381	Epidote	0.298226
51A7H	Middle Quaternary	51A7H_16	3352	Clinozoisite	0.092268
51A7H	Middle Quaternary	51A7H_18	3357	Clinozoisite	0.127778
51A7H	Middle Quaternary	51A7H_19	3370	Epidote	0.220104
51A7H	Middle Quaternary	51A7H_20	3369	Epidote	0.213002
51A7H	Middle Quaternary	51A7H_22	3372	Epidote	0.234308
51A7H	Middle Quaternary	51A7H_23	3373	Epidote	0.24141
51A7H	Middle Quaternary	51A7H_25	3378	Epidote	0.27692
51A12F	Middle Quaternary	51A12F_1	3363	Clinozoisite	0.17039
51A12F	Middle Quaternary	51A12F_2	3379	Epidote	0.284022
51A12F	Middle Quaternary	51A12F_5	3374	Epidote	0.248512
51A12F	Middle Quaternary	51A12F_6	3372	Epidote	0.234308
51A12F	Middle Quaternary	51A12F_7	3359	Clinozoisite	0.141982
51A12F	Middle Quaternary	51A12F_8	3381	Epidote	0.298226
51A12F	Middle Quaternary	51A12F_9	3385	Epidote	0.326634
51A12F	Middle Quaternary	51A12F_14	3381	Epidote	0.298226
51A12F	Middle Quaternary	51A12F_16	3366	Clinozoisite	0.191696
51A12F	Middle Quaternary	51A12F_17	3386	Epidote	0.333736
51A12F	Middle Quaternary	51A12F_19	3367	Clinozoisite	0.198798
51A12F	Middle Quaternary	51A12F_21	3360	Clinozoisite	0.149084
51A12F	Middle Quaternary	51A12F_22	3374	Epidote	0.248512
51A12F	Middle Quaternary	51A12F_23	3354	Clinozoisite	0.106472
51A12F	Middle Quaternary	51A12F_24	3375	Epidote	0.255614
51A12F	Middle Quaternary	51A12F_25	3379	Epidote	0.284022
51A12F	Middle Quaternary	51A12F_27	3345	Clinozoisite	0.042554
51A12F	Middle Quaternary	51A12F_28	3391	Epidote	0.369246
51A12F	Middle Quaternary	51A12F_29	3368.5	Clinozoisite	0.209451
51A12F	Middle Quaternary	51A12F_30	3383	Epidote	0.31243
51A12F	Middle Quaternary	51A12F_31	3361	Clinozoisite	0.156186
51A12F	Middle Quaternary	51A12F_32	3378	Epidote	0.27692
51A12F	Middle Quaternary	51A12F_34	3359	Clinozoisite	0.141982
51A12F	Middle Quaternary	51A12F_36	3372	Epidote	0.234308
51A12F	Middle Quaternary	51A12F_38	3371	Epidote	0.227206
51A12F	Middle Quaternary	51A12F_40	3362	Clinozoisite	0.163288
51A12F	Middle Quaternary	51A12F_41	3376	Epidote	0.262716
51A12F	Middle Quaternary	51A12F_42	3372	Epidote	0.234308
51A12F	Middle Quaternary	51A12F_44	3382	Epidote	0.305328
51A12F	Middle Quaternary	51A12F_45	3385	Epidote	0.326634
51A12F	Middle Quaternary	51A12F_46	3379	Epidote	0.284022
51A12F	Middle Quaternary	51A12F_48	3376	Epidote	0.262716
51A14F	Early Quaternary	51A14F_1	3368	Clinozoisite	0.2059
51A14F	Early Quaternary	51A14F_3	3367	Clinozoisite	0.198798
51A14F	Early Quaternary	51A14F_5	3374	Epidote	0.248512
51A14F	Early Quaternary	51A14F_7b	3370	Epidote	0.220104
51A14F	Early Quaternary	51A14F_8	3356	Clinozoisite	0.120676
51A14F	Early Quaternary	51A14F_10	3381	Epidote	0.298226
51A14F	Early Quaternary	51A14F_12	3388	Epidote	0.34794
51A14F	Early Quaternary	51A14F_13	3377	Epidote	0.269818
51A14F	Early Quaternary	51A14F_14	3381	Epidote	0.298226
51A14F	Early Quaternary	51A14F_14b	3370	Epidote	0.220104
51A14F	Early Quaternary	51A14F_15	3384	Epidote	0.319532
51A14F	Early Quaternary	51A14F_20	3378	Epidote	0.27692
51A14F	Early Quaternary	51A14F_22	3363	Clinozoisite	0.17039
51A14F	Early Quaternary	51A14F_23	3382	Epidote	0.305328
51A14F	Early Quaternary	51A14F_24	3373	Epidote	0.24141
51A14F	Early Quaternary	51A14F_25	3380	Epidote	0.291124
51A14F	Early Quaternary	51A14F_26	3372	Epidote	0.234308
51A14F	Early Quaternary	51A14F_27	3365	Clinozoisite	0.184594
51A14F	Early Quaternary	51A14F_28	3394	Epidote	0.390552
51A14F	Early Quaternary	51A14F_29	3367	Clinozoisite	0.198798
51A14F	Early Quaternary	51A14F_30	3361	Clinozoisite	0.156186
51A20F	Early Quaternary	51A20F_4	3376	Epidote	0.262716
51A20F	Early Quaternary	51A20F_5	3373	Epidote	0.24141
51A20F	Early Quaternary	51A20F_6	3389	Epidote	0.355042
51A20F	Early Quaternary	51A20F_7	3365	Clinozoisite	0.184594
51A20F	Early Quaternary	51A20F_8	3368	Clinozoisite	0.2059
51A20F	Early Quaternary	51A20F_9	3368	Clinozoisite	0.2059
51A20F	Early Quaternary	51A20F_11	3366	Clinozoisite	0.191696
51A20F	Early Quaternary	51A20F_12	3378	Epidote	0.27692
51A20F	Early Quaternary	51A20F_14	3372	Epidote	0.234308
51A20F	Early Quaternary	51A20F_15	3387	Epidote	0.340838
51A20F	Early Quaternary	51A20F_16	3358	Clinozoisite	0.13488
51A20F	Early Quaternary	51A20F_17	3371	Epidote	0.227206
51A20F	Early Quaternary	51A20F_18	3380	Epidote	0.291124
51A20F	Early Quaternary	51A20F_19	3378	Epidote	0.27692
51A20F	Early Quaternary	51A20F_21	3382	Epidote	0.305328
51A20F	Early Quaternary	51A20F_23	3360	Clinozoisite	0.149084
51A20F	Early Quaternary	51A20F_24	3378	Epidote	0.27692
51A20F	Early Quaternary	51A20F_25	3361	Clinozoisite	0.156186
51A20F	Early Quaternary	51A20F_26	3365	Clinozoisite	0.184594
51A20F	Early Quaternary	51A20F_27	3367	Clinozoisite	0.198798
51A20F	Early Quaternary	51A20F_28	3365	Clinozoisite	0.184594
51A20F	Early Quaternary	51A20F_29	3373	Epidote	0.24141
51A20F	Early Quaternary	51A20F_30	3368	Clinozoisite	0.2059
51A22H	Early Quaternary	51A22H_2	3374	Epidote	0.248512
51A22H	Early Quaternary	51A22H_3	3356	Clinozoisite	0.120676
51A22H	Early Quaternary	51A22H_5	3382	Epidote	0.305328
51A22H	Early Quaternary	51A22H_7	3378	Epidote	0.27692
51A22H	Early Quaternary	51A22H_11	3355	Clinozoisite	0.113574
51A22H	Early Quaternary	51A22H_13	3371	Epidote	0.227206
51A22H	Early Quaternary	51A22H_14	3372	Epidote	0.234308
51A22H	Early Quaternary	51A22H_15	3357	Clinozoisite	0.127778
51A22H	Early Quaternary	51A22H_16	3380	Epidote	0.291124
51A22H	Early Quaternary	51A22H_18	3387	Epidote	0.340838
51A22H	Early Quaternary	51A22H_21	3376	Epidote	0.262716
51A22H	Early Quaternary	51A22H_23	3359	Clinozoisite	0.141982
51A27H	Zancl.-Tortonian	51A27H_1	3374	Epidote	0.248512
51A27H	Zancl.-Tortonian	51A27H_2	3365	Clinozoisite	0.184594
51A27H	Zancl.-Tortonian	51A27H_4	3373	Epidote	0.24141
51A27H	Zancl.-Tortonian	51A27H_5	3369	Epidote	0.213002
51A27H	Zancl.-Tortonian	51A27H_6	3368	Clinozoisite	0.2059
51A27H	Zancl.-Tortonian	51A27H_7	3347	Clinozoisite	0.056758
51A27H	Zancl.-Tortonian	51A27H_8	3354	Clinozoisite	0.106472
51A27H	Zancl.-Tortonian	51A27H_9	3373	Epidote	0.24141
51A27H	Zancl.-Tortonian	51A27H_11	3378	Epidote	0.27692
51A27H	Zancl.-Tortonian	51A27H_16	3379	Epidote	0.284022
51A27H	Zancl.-Tortonian	51A27H_23	3367	Clinozoisite	0.198798
51A27H	Zancl.-Tortonian	51A27H_25	3379	Epidote	0.284022
51A27H	Zancl.-Tortonian	51A27H_26	3373	Epidote	0.24141
51A27H	Zancl.-Tortonian	51A27H_27	3365	Clinozoisite	0.184594
51A27H	Zancl.-Tortonian	51A27H_28	3361	Clinozoisite	0.156186
51A27H	Zancl.-Tortonian	51A27H_29	3367	Clinozoisite	0.198798
51A27H	Zancl.-Tortonian	51A27H_31	3379	Epidote	0.284022
51A27H	Zancl.-Tortonian	51A27H_34	3383	Epidote	0.31243
51A27H	Zancl.-Tortonian	51A27H_35	3382	Epidote	0.305328
51A27H	Zancl.-Tortonian	51A27H_37	3383	Epidote	0.31243
51A27H	Zancl.-Tortonian	51A27H_38	3362	Clinozoisite	0.163288
51A27H	Zancl.-Tortonian	51A27H_39	3358	Clinozoisite	0.13488
51A27H	Zancl.-Tortonian	51A27H_40	3370	Epidote	0.220104
51A27H	Zancl.-Tortonian	51A27H_41	3364	Clinozoisite	0.177492
51A27H	Zancl.-Tortonian	51A27H_42	3367	Clinozoisite	0.198798
51A27H	Zancl.-Tortonian	51A27H_45	3368	Clinozoisite	0.2059
51A27H	Zancl.-Tortonian	51A27H_46	3378	Epidote	0.27692
51A27H	Zancl.-Tortonian	51A27H_48	3372	Epidote	0.234308
51A27H	Zancl.-Tortonian	51A27H_50	3370	Epidote	0.220104
51A27H	Zancl.-Tortonian	51A27H_51	3371	Epidote	0.227206
51A27H	Zancl.-Tortonian	51A27H_52	3367	Clinozoisite	0.198798
51A27H	Zancl.-Tortonian	51A27H_53	3371	Epidote	0.227206
51A27H	Zancl.-Tortonian	51A27H_55	3366	Clinozoisite	0.191696
51A27H	Zancl.-Tortonian	51A27H_56	3360	Clinozoisite	0.149084
51A27H	Zancl.-Tortonian	51A27H_57	3368	Clinozoisite	0.2059
51A27H	Zancl.-Tortonian	51A27H_62	3367	Clinozoisite	0.198798
51A27H	Zancl.-Tortonian	51A27H_63	3362	Clinozoisite	0.163288
51A27H	Zancl.-Tortonian	51A27H_66	3359	Clinozoisite	0.141982
51A27H	Zancl.-Tortonian	51A27H_67	3373	Epidote	0.24141
51A27H	Zancl.-Tortonian	51A27H_69	3370	Epidote	0.220104
51A27H	Zancl.-Tortonian	51A27H_71	3373	Epidote	0.24141
51A27H	Zancl.-Tortonian	51A27H_72	3373	Epidote	0.24141
51A31F	Zancl.-Tortonian	51A31F_1	3373	Epidote	0.24141
51A31F	Zancl.-Tortonian	51A31F_2	3387	Epidote	0.340838
51A31F	Zancl.-Tortonian	51A31F_5	3366	Clinozoisite	0.191696
51A31F	Zancl.-Tortonian	51A31F_8	3369	Epidote	0.213002
51A31F	Zancl.-Tortonian	51A31F_9	3381	Epidote	0.298226
51A31F	Zancl.-Tortonian	51A31F_11	3374	Epidote	0.248512
51A31F	Zancl.-Tortonian	51A31F_13	3388	Epidote	0.34794
51A31F	Zancl.-Tortonian	51A31F_14	3379	Epidote	0.284022
51A31F	Zancl.-Tortonian	51A31F_16	3374	Epidote	0.248512
51A31F	Zancl.-Tortonian	51A31F_18	3372	Epidote	0.234308
51A31F	Zancl.-Tortonian	51A31F_19	3371	Epidote	0.227206
51A31F	Zancl.-Tortonian	51A31F_19b	3362	Clinozoisite	0.163288
51A31F	Zancl.-Tortonian	51A31F_21	3370	Epidote	0.220104
51A31F	Zancl.-Tortonian	51A31F_23	3382	Epidote	0.305328
51A31F	Zancl.-Tortonian	51A31F_25	3358	Clinozoisite	0.13488
51A31F	Zancl.-Tortonian	51A31F_26	3363	Clinozoisite	0.17039
51A31F	Zancl.-Tortonian	51A31F_27	3362	Clinozoisite	0.163288
51A31F	Zancl.-Tortonian	51A31F_28	3358	Clinozoisite	0.13488
51A31F	Zancl.-Tortonian	51A31F_30	3364	Clinozoisite	0.177492
51A31F	Zancl.-Tortonian	51A31F_31	3382	Epidote	0.305328
51A31F	Zancl.-Tortonian	51A31F_32	3375	Epidote	0.255614
51A31F	Zancl.-Tortonian	51A31F_33	3361	Clinozoisite	0.156186
51A31F	Zancl.-Tortonian	51A31F_36	3365	Clinozoisite	0.184594
51A31F	Zancl.-Tortonian	51A31F_37	3371	Epidote	0.227206
51A31F	Zancl.-Tortonian	51A31F_38	3366	Clinozoisite	0.191696
51A31F	Zancl.-Tortonian	51A31F_40	3369	Epidote	0.213002
51A31F	Zancl.-Tortonian	51A31F_41	3364	Clinozoisite	0.177492
51A31F	Zancl.-Tortonian	51A31F_43	3365	Clinozoisite	0.184594
51A31F	Zancl.-Tortonian	51A31F_44	3370	Epidote	0.220104
51A31F	Zancl.-Tortonian	51A31F_45	3372	Epidote	0.234308
51A31F	Zancl.-Tortonian	51A31F_46	3357	Clinozoisite	0.127778
51A31F	Zancl.-Tortonian	51A31F_48	3358	Clinozoisite	0.13488
51A31F	Zancl.-Tortonian	51A31F_49	3372	Epidote	0.234308
51A31F	Zancl.-Tortonian	51A31F_50	3380	Epidote	0.291124
51A31F	Zancl.-Tortonian	51A31F_51	3374	Epidote	0.248512
51A31F	Zancl.-Tortonian	51A31F_53	3364	Clinozoisite	0.177492
51A31F	Zancl.-Tortonian	51A31F_54	3373	Epidote	0.24141
51A31F	Zancl.-Tortonian	51A31F_55	3361	Clinozoisite	0.156186
51A31F	Zancl.-Tortonian	51A31F_56	3372	Epidote	0.234308
51A31F	Zancl.-Tortonian	51A31F_57	3374	Epidote	0.248512
51A31F	Zancl.-Tortonian	51A31F_58	3383	Epidote	0.31243
51A31F	Zancl.-Tortonian	51A31F_59	3364	Clinozoisite	0.177492
51A39F	Zancl.-Tortonian	51A39F_2	3378	Epidote	0.27692
51A39F	Zancl.-Tortonian	51A39F_3	3361	Clinozoisite	0.156186
51A39F	Zancl.-Tortonian	51A39F_4	3375	Epidote	0.255614
51A39F	Zancl.-Tortonian	51A39F_5	3390	Epidote	0.362144
51A39F	Zancl.-Tortonian	51A39F_6	3379	Epidote	0.284022
51A39F	Zancl.-Tortonian	51A39F_7	3370	Epidote	0.220104
51A39F	Zancl.-Tortonian	51A39F_8	3369	Epidote	0.213002
51A39F	Zancl.-Tortonian	51A39F_10	3380	Epidote	0.291124
51A39F	Zancl.-Tortonian	51A39F_12	3384	Epidote	0.319532
51A39F	Zancl.-Tortonian	51A39F_13	3367	Clinozoisite	0.198798
51A39F	Zancl.-Tortonian	51A39F_14	3366	Clinozoisite	0.191696
51A39F	Zancl.-Tortonian	51A39F_15	3365	Clinozoisite	0.184594
51A39F	Zancl.-Tortonian	51A39F_16	3383	Epidote	0.31243
51A39F	Zancl.-Tortonian	51A39F_17	3373	Epidote	0.24141
51A39F	Zancl.-Tortonian	51A39F_18	3379	Epidote	0.284022
51A39F	Zancl.-Tortonian	51A39F_19	3367	Clinozoisite	0.198798
51A39F	Zancl.-Tortonian	51A39F_20	3389	Epidote	0.355042
51A39F	Zancl.-Tortonian	51A39F_22	3368	Clinozoisite	0.2059
51A39F	Zancl.-Tortonian	51A39F_23	3373	Epidote	0.24141
51A39F	Zancl.-Tortonian	51A39F_24	3378	Epidote	0.27692
51A39F	Zancl.-Tortonian	51A39F_26	3371	Epidote	0.227206
51A39F	Zancl.-Tortonian	51A39F_27	3379	Epidote	0.284022
51A39F	Zancl.-Tortonian	51A39F_31	3380	Epidote	0.291124
51A39F	Zancl.-Tortonian	51A39F_32	3371	Epidote	0.227206
51A39F	Zancl.-Tortonian	51A39F_33	3384	Epidote	0.319532
51A39F	Zancl.-Tortonian	51A39F_34	3356	Clinozoisite	0.120676
51A39F	Zancl.-Tortonian	51A39F_37	3363	Clinozoisite	0.17039
51A39F	Zancl.-Tortonian	51A39F_38	3358	Clinozoisite	0.13488
51A39F	Zancl.-Tortonian	51A39F_39	3384	Epidote	0.319532
51A39F	Zancl.-Tortonian	51A39F_41	3385	Epidote	0.326634
51A39F	Zancl.-Tortonian	51A39F_44	3367	Clinozoisite	0.198798
51A39F	Zancl.-Tortonian	51A39F_45	3387	Epidote	0.340838
51A39F	Zancl.-Tortonian	51A39F_46	3378	Epidote	0.27692
51A66F	Zancl.-Tortonian	51A66F_1	3362	Clinozoisite	0.163288
51A66F	Zancl.-Tortonian	51A66F_2	3370	Epidote	0.220104
51A66F	Zancl.-Tortonian	51A66F_3	3394	Epidote	0.390552
51A66F	Zancl.-Tortonian	51A66F_4	3365	Clinozoisite	0.184594
51A66F	Zancl.-Tortonian	51A66F_5	3374	Epidote	0.248512
51A66F	Zancl.-Tortonian	51A66F_6	3385	Epidote	0.326634
51A66F	Zancl.-Tortonian	51A66F_7	3387	Epidote	0.340838
51A66F	Zancl.-Tortonian	51A66F_8	3373	Epidote	0.24141
51A66F	Zancl.-Tortonian	51A66F_9	3367	Clinozoisite	0.198798
51A66F	Zancl.-Tortonian	51A66F_11	3387	Epidote	0.340838
51A66F	Zancl.-Tortonian	51A66F_12	3400	Epidote	0.433164
51A66F	Zancl.-Tortonian	51A66F_13	3377	Epidote	0.269818
51A66F	Zancl.-Tortonian	51A66F_14	3387	Epidote	0.340838
51A66F	Zancl.-Tortonian	51A66F_15	3374	Epidote	0.248512
51A66F	Zancl.-Tortonian	51A66F_16	3387	Epidote	0.340838
51A66F	Zancl.-Tortonian	51A66F_18	3366	Clinozoisite	0.191696
51A66F	Zancl.-Tortonian	51A66F_21	3364	Clinozoisite	0.177492
51A66F	Zancl.-Tortonian	51A66F_26	3388	Epidote	0.34794
51A66F	Zancl.-Tortonian	51A66F_30	3386	Epidote	0.333736
51A66F	Zancl.-Tortonian	51A66F_32	3383	Epidote	0.31243
51A66F	Zancl.-Tortonian	51A66F_33	3370	Epidote	0.220104
51A66F	Zancl.-Tortonian	51A66F_34	3358	Clinozoisite	0.13488
51A66F	Zancl.-Tortonian	51A66F_37	3370	Epidote	0.220104
51A66F	Zancl.-Tortonian	51A66F_39	3374	Epidote	0.248512
51A66F	Zancl.-Tortonian	51A66F_41	3389	Epidote	0.355042
51A66F	Zancl.-Tortonian	51A66F_43	3385	Epidote	0.326634
51A66F	Zancl.-Tortonian	51A66F_44	3387	Epidote	0.340838
51A66F	Zancl.-Tortonian	51A66F_45	3360	Clinozoisite	0.149084
51A66F	Zancl.-Tortonian	51A66F_46	3379	Epidote	0.284022
51A66F	Zancl.-Tortonian	51A66F_48	3377	Epidote	0.269818
51A66F	Zancl.-Tortonian	51A66F_49	3375	Epidote	0.255614
51A66F	Zancl.-Tortonian	51A66F_51	3392	Epidote	0.376348
51A66F	Zancl.-Tortonian	51A66F_52	3386	Epidote	0.333736
51A66F	Zancl.-Tortonian	51A66F_54	3370	Epidote	0.220104
51A66F	Zancl.-Tortonian	51A66F_55	3360	Clinozoisite	0.149084
51A66F	Zancl.-Tortonian	51A66F_56	3360	Clinozoisite	0.149084
51A66F	Zancl.-Tortonian	51A66F_57	3366	Clinozoisite	0.191696
51A66F	Zancl.-Tortonian	51A66F_60	3383	Epidote	0.31243
51A66F	Zancl.-Tortonian	51A66F_61	3388	Epidote	0.34794
51A66F	Zancl.-Tortonian	51A66F_62	3357	Clinozoisite	0.127778
51A66F	Zancl.-Tortonian	51A66F_63	3361	Clinozoisite	0.156186
51A66F	Zancl.-Tortonian	51A66F_64	3363	Clinozoisite	0.17039
51A66F	Zancl.-Tortonian	51A66F_65	3374	Epidote	0.248512
51A66F	Zancl.-Tortonian	51A66F_66	3387	Epidote	0.340838
51A74F	Zancl.-Tortonian	51A74F_1	3372	Epidote	0.234308
51A74F	Zancl.-Tortonian	51A74F_4	3378	Epidote	0.27692
51A74F	Zancl.-Tortonian	51A74F_5	3386	Epidote	0.333736
51A74F	Zancl.-Tortonian	51A74F_7	3349	Clinozoisite	0.070962
51A74F	Zancl.-Tortonian	51A74F_8	3388	Epidote	0.34794
51A74F	Zancl.-Tortonian	51A74F_10	3373	Epidote	0.24141
51A74F	Zancl.-Tortonian	51A74F_11	3375	Epidote	0.255614
51A74F	Zancl.-Tortonian	51A74F_13	3391	Epidote	0.369246
51A74F	Zancl.-Tortonian	51A74F_16	3363	Clinozoisite	0.17039
51A74F	Zancl.-Tortonian	51A74F_17	3366	Clinozoisite	0.191696
51A74F	Zancl.-Tortonian	51A74F_18	3369	Epidote	0.213002
51A74F	Zancl.-Tortonian	51A74F_19	3385	Epidote	0.326634
51A74F	Zancl.-Tortonian	51A74F_20	3349	Clinozoisite	0.070962
51A74F	Zancl.-Tortonian	51A74F_21	3374	Epidote	0.248512
51A74F	Zancl.-Tortonian	51A74F_22	3383	Epidote	0.31243
51A74F	Zancl.-Tortonian	51A74F_23	3378	Epidote	0.27692
51A74F	Zancl.-Tortonian	51A74F_27	3384	Epidote	0.319532
51A74F	Zancl.-Tortonian	51A74F_28	3387	Epidote	0.340838
51A74F	Zancl.-Tortonian	51A74F_30	3378	Epidote	0.27692
51A74F	Zancl.-Tortonian	51A74F_31	3387	Epidote	0.340838
51A74F	Zancl.-Tortonian	51A74F_32	3370	Epidote	0.220104
51A74F	Zancl.-Tortonian	51A74F_33	3382	Epidote	0.305328
51A74F	Zancl.-Tortonian	51A74F_34	3381	Epidote	0.298226
51A74F	Zancl.-Tortonian	51A74F_35	3350	Clinozoisite	0.078064
51A74F	Zancl.-Tortonian	51A74F_36	3369	Epidote	0.213002
51A74F	Zancl.-Tortonian	51A74F_37	3368.4	Clinozoisite	0.208741
51A74F	Zancl.-Tortonian	51A74F_38	3353	Clinozoisite	0.09937
51A74F	Zancl.-Tortonian	51A74F_41	3388	Epidote	0.34794
51A74F	Zancl.-Tortonian	51A74F_43	3370	Epidote	0.220104
51A74F	Zancl.-Tortonian	51A74F_46	3361	Clinozoisite	0.156186
51A74F	Zancl.-Tortonian	51A74F_49	3373	Epidote	0.24141
51A74F	Zancl.-Tortonian	51A74F_50	3378	Epidote	0.27692
51A74F	Zancl.-Tortonian	51A74F_51	3383	Epidote	0.31243
51A74F	Zancl.-Tortonian	51A74F_53	3362	Clinozoisite	0.163288
51A74F	Zancl.-Tortonian	51A74F_54	3375	Epidote	0.255614
51A74F	Zancl.-Tortonian	51A74F_55	3356	Clinozoisite	0.120676
51A74F	Zancl.-Tortonian	51A74F_56	3384	Epidote	0.319532
51A74F	Zancl.-Tortonian	51A74F_58	3388	Epidote	0.34794
51A80F	Zancl.-Tortonian	51A80F_2	3348	Clinozoisite	0.06386
51A80F	Zancl.-Tortonian	51A80F_4	3378	Epidote	0.27692
51A80F	Zancl.-Tortonian	51A80F_6	3373	Epidote	0.24141
51A80F	Zancl.-Tortonian	51A80F_7	3378	Epidote	0.27692
51A80F	Zancl.-Tortonian	51A80F_8	3386	Epidote	0.333736
51A80F	Zancl.-Tortonian	51A80F_10	3379	Epidote	0.284022
51A80F	Zancl.-Tortonian	51A80F_12	3374	Epidote	0.248512
51A80F	Zancl.-Tortonian	51A80F_14	3368	Clinozoisite	0.2059
51A80F	Zancl.-Tortonian	51A80F_15	3376	Epidote	0.262716
51A80F	Zancl.-Tortonian	51A80F_16	3369	Epidote	0.213002
51A80F	Zancl.-Tortonian	51A80F_18	3379	Epidote	0.284022
51A80F	Zancl.-Tortonian	51A80F_19	3379	Epidote	0.284022
51A80F	Zancl.-Tortonian	51A80F_20	3374	Epidote	0.248512
51A80F	Zancl.-Tortonian	51A80F_21	3365	Clinozoisite	0.184594
51A80F	Zancl.-Tortonian	51A80F_23	3371	Epidote	0.227206
51A80F	Zancl.-Tortonian	51A80F_25	3368	Clinozoisite	0.2059
51A80F	Zancl.-Tortonian	51A80F_27	3365	Clinozoisite	0.184594
51A80F	Zancl.-Tortonian	51A80F_28	3394	Epidote	0.390552
51A80F	Zancl.-Tortonian	51A80F_28b	3375	Epidote	0.255614
51A80F	Zancl.-Tortonian	51A80F_29	3382	Epidote	0.305328
51A80F	Zancl.-Tortonian	51A80F_30	3391	Epidote	0.369246
51A80F	Zancl.-Tortonian	51A80F_31	3371	Epidote	0.227206
51A80F	Zancl.-Tortonian	51A80F_33	3365	Clinozoisite	0.184594
51A80F	Zancl.-Tortonian	51A80F_35	3378	Epidote	0.27692
51A80F	Zancl.-Tortonian	51A80F_36	3384	Epidote	0.319532
51A80F	Zancl.-Tortonian	51A80F_38	3378	Epidote	0.27692
51A80F	Zancl.-Tortonian	51A80F_40	3370	Epidote	0.220104
51A80F	Zancl.-Tortonian	51A80F_43	3368	Clinozoisite	0.2059
51A80F	Zancl.-Tortonian	51A80F_44	3365	Clinozoisite	0.184594
51A80F	Zancl.-Tortonian	51A80F_46	3375	Epidote	0.255614
51A80F	Zancl.-Tortonian	51A80F_47	3384	Epidote	0.319532
51A80F	Zancl.-Tortonian	51A80F_50	3365	Clinozoisite	0.184594
51A80F	Zancl.-Tortonian	51A80F_51	3362	Clinozoisite	0.163288
51A80F	Zancl.-Tortonian	51A80F_52	3374	Epidote	0.248512
51A80F	Zancl.-Tortonian	51A80F_54	3371	Epidote	0.227206
51A80F	Zancl.-Tortonian	51A80F_55	3372	Epidote	0.234308
51A80F	Zancl.-Tortonian	51A80F_56	3382	Epidote	0.305328
51A80F	Zancl.-Tortonian	51A80F_57	3363	Clinozoisite	0.17039
51A80F	Zancl.-Tortonian	51A80F_58	3362	Clinozoisite	0.163288
51A80F	Zancl.-Tortonian	51A80F_60	3371	Epidote	0.227206
51A80F	Zancl.-Tortonian	51A80F_61	3361	Clinozoisite	0.156186
51A80F	Zancl.-Tortonian	51A80F_63	3368	Clinozoisite	0.2059
51A111X	Zancl.-Tortonian	51A111X_1	3359	Clinozoisite	0.141982
51A111X	Zancl.-Tortonian	51A111X_4	3370	Epidote	0.220104
51A111X	Zancl.-Tortonian	51A111X_5	3367	Clinozoisite	0.198798
51A111X	Zancl.-Tortonian	51A111X_8	3367	Clinozoisite	0.198798
51A111X	Zancl.-Tortonian	51A111X_9	3347	Clinozoisite	0.056758
51A111X	Zancl.-Tortonian	51A111X_10	3361	Clinozoisite	0.156186
51A111X	Zancl.-Tortonian	51A111X_11	3365	Clinozoisite	0.184594
51A111X	Zancl.-Tortonian	51A111X_12	3382	Epidote	0.305328
51A111X	Zancl.-Tortonian	51A111X_13	3358	Clinozoisite	0.13488
51A111X	Zancl.-Tortonian	51A111X_15	3378	Epidote	0.27692
51A111X	Zancl.-Tortonian	51A111X_17	3363	Clinozoisite	0.17039
51A111X	Zancl.-Tortonian	51A111X_18	3377	Epidote	0.269818
51A111X	Zancl.-Tortonian	51A111X_19	3385	Epidote	0.326634
51A111X	Zancl.-Tortonian	51A111X_20	3369	Epidote	0.213002
51A111X	Zancl.-Tortonian	51A111X_21	3368	Clinozoisite	0.2059
51A111X	Zancl.-Tortonian	51A111X_22	3357	Clinozoisite	0.127778
51A111X	Zancl.-Tortonian	51A111X_23	3386	Epidote	0.333736
51A111X	Zancl.-Tortonian	51A111X_24	3379	Epidote	0.284022
51A111X	Zancl.-Tortonian	51A111X_26	3362	Clinozoisite	0.163288
51A111X	Zancl.-Tortonian	51A111X_28	3373	Epidote	0.24141
51A111X	Zancl.-Tortonian	51A111X_29	3377	Epidote	0.269818
51A111X	Zancl.-Tortonian	51A111X_30	3373	Epidote	0.24141
51A111X	Zancl.-Tortonian	51A111X_31	3370	Epidote	0.220104
51A111X	Zancl.-Tortonian	51A111X_32	3369	Epidote	0.213002
51A111X	Zancl.-Tortonian	51A111X_33	3360	Clinozoisite	0.149084
51A111X	Zancl.-Tortonian	51A111X_34	3368	Clinozoisite	0.2059
51A111X	Zancl.-Tortonian	51A111X_36	3382	Epidote	0.305328
51A111X	Zancl.-Tortonian	51A111X_37	3368	Epidote	0.2059
51A111X	Zancl.-Tortonian	51A111X_39	3385	Epidote	0.326634
51A111X	Zancl.-Tortonian	51A111X_40	3377	Epidote	0.269818
51A111X	Zancl.-Tortonian	51A111X_41	3375	Epidote	0.255614
51A111X	Zancl.-Tortonian	51A111X_42	3374	Epidote	0.248512
51A111X	Zancl.-Tortonian	51A111X_44	3372	Epidote	0.234308
51A111X	Zancl.-Tortonian	51A111X_45	3365	Clinozoisite	0.184594
51A111X	Zancl.-Tortonian	51A111X_47	3379	Epidote	0.284022
51A111X	Zancl.-Tortonian	51A111X_48	3372	Epidote	0.234308
51A111X	Zancl.-Tortonian	51A111X_49	3381	Epidote	0.298226
51A111X	Zancl.-Tortonian	51A111X_50	3375	Epidote	0.255614
51A111X	Zancl.-Tortonian	51A111X_51	3363	Clinozoisite	0.17039
51A111X	Zancl.-Tortonian	51A111X_52	3384	Epidote	0.319532
51A111X	Zancl.-Tortonian	51A111X_53	3352	Clinozoisite	0.092268
51A111X	Zancl.-Tortonian	51A111X_56	3372	Epidote	0.234308
51A111X	Zancl.-Tortonian	51A111X_57	3366	Clinozoisite	0.191696
51A111X	Zancl.-Tortonian	51A111X_58	3349	Clinozoisite	0.070962
51A111X	Zancl.-Tortonian	51A111X_62	3356	Clinozoisite	0.120676
51A111X	Zancl.-Tortonian	51A111X_66	3372	Epidote	0.234308
51A111X	Zancl.-Tortonian	51A111X_67	3376	Epidote	0.262716
51A111X	Zancl.-Tortonian	51A111X_69	3358	Clinozoisite	0.13488
51A111X	Zancl.-Tortonian	51A111X_71	3380	Epidote	0.291124
51A111X	Zancl.-Tortonian	51A111X_72	3377	Epidote	0.269818
51A111X	Zancl.-Tortonian	51A111X_73	3370	Epidote	0.220104
51A111X	Zancl.-Tortonian	51A111X_74	3373	Epidote	0.24141
51A111X	Zancl.-Tortonian	51A111X_75	3379	Epidote	0.284022
51A111X	Zancl.-Tortonian	51A111X_76	3370	Epidote	0.220104
51A111X	Zancl.-Tortonian	51A111X_77	3372	Epidote	0.234308
51A111X	Zancl.-Tortonian	51A111X_79	3380	Epidote	0.291124
51B16R	Zancl.-Tortonian	51B16R_2	3393	Epidote	0.38345
51B16R	Zancl.-Tortonian	51B16R_3	3388	Epidote	0.34794
51B16R	Zancl.-Tortonian	51B16R_4	3378	Epidote	0.27692
51B16R	Zancl.-Tortonian	51B16R_5	3382	Epidote	0.305328
51B16R	Zancl.-Tortonian	51B16R_6	3367	Clinozoisite	0.198798
51B16R	Zancl.-Tortonian	51B16R_7	3385	Epidote	0.326634
51B16R	Zancl.-Tortonian	51B16R_8	3377	Epidote	0.269818
51B16R	Zancl.-Tortonian	51B16R_10	3388	Epidote	0.34794
51B16R	Zancl.-Tortonian	51B16R_13	3377	Epidote	0.269818
51B16R	Zancl.-Tortonian	51B16R_15	3366	Clinozoisite	0.191696
51B16R	Zancl.-Tortonian	51B16R_16	3379	Epidote	0.284022
51B16R	Zancl.-Tortonian	51B16R_17	3369	Epidote	0.213002
51B16R	Zancl.-Tortonian	51B16R_20	3367	Clinozoisite	0.198798
51B16R	Zancl.-Tortonian	51B16R_22	3365	Clinozoisite	0.184594
51B16R	Zancl.-Tortonian	51B16R_25	3372	Epidote	0.234308
51B16R	Zancl.-Tortonian	51B16R_27	3365	Clinozoisite	0.184594
51B16R	Zancl.-Tortonian	51B16R_28	3371	Epidote	0.227206
51B16R	Zancl.-Tortonian	51B16R_29	3382	Epidote	0.305328
51B16R	Zancl.-Tortonian	51B16R_30	3357	Clinozoisite	0.127778
51B16R	Zancl.-Tortonian	51B16R_33	3376	Epidote	0.262716
51B16R	Zancl.-Tortonian	51B16R_34	3374	Epidote	0.248512
51B16R	Zancl.-Tortonian	51B16R_36	3364	Clinozoisite	0.177492
51B16R	Zancl.-Tortonian	51B16R_37	3374	Epidote	0.248512
51B16R	Zancl.-Tortonian	51B16R_39	3362	Clinozoisite	0.163288
51B16R	Zancl.-Tortonian	51B16R_41	3374	Epidote	0.248512
51B16R	Zancl.-Tortonian	51B16R_42	3365	Clinozoisite	0.184594
51B16R	Zancl.-Tortonian	51B16R_43	3386	Epidote	0.333736
51B16R	Zancl.-Tortonian	51B16R_45	3366	Clinozoisite	0.191696
51B16R	Zancl.-Tortonian	51B16R_50	3374	Epidote	0.248512
51B16R	Zancl.-Tortonian	51B16R_52	3386	Epidote	0.333736
51B16R	Zancl.-Tortonian	51B16R_57	3353	Clinozoisite	0.09937
51B16R	Zancl.-Tortonian	51B16R_58	3379	Epidote	0.284022
51B16R	Zancl.-Tortonian	51B16R_59	3387	Epidote	0.340838
51B16R	Zancl.-Tortonian	51B16R_61	3376	Epidote	0.262716
51B16R	Zancl.-Tortonian	51B16R_63	3369	Epidote	0.213002
51B49R	Lower Miocene	51B49R_1	3368	Clinozoisite	0.2059
51B49R	Lower Miocene	51B49R_2	3380	Epidote	0.291124
51B49R	Lower Miocene	51B49R_4	3357	Clinozoisite	0.127778
51B49R	Lower Miocene	51B49R_5	3357	Clinozoisite	0.127778
51B49R	Lower Miocene	51B49R_8	3391	Epidote	0.369246
51B49R	Lower Miocene	51B49R_9	3355	Clinozoisite	0.113574
51B49R	Lower Miocene	51B49R_10	3367	Clinozoisite	0.198798
51B49R	Lower Miocene	51B49R_14	3368	Clinozoisite	0.2059
51B49R	Lower Miocene	51B49R_15	3373	Epidote	0.24141
51B49R	Lower Miocene	51B49R_16	3377	Epidote	0.269818
51B49R	Lower Miocene	51B49R_17	3373	Epidote	0.24141
51B49R	Lower Miocene	51B49R_20	3379	Epidote	0.284022
51B49R	Lower Miocene	51B49R_21	3386	Epidote	0.333736
51B49R	Lower Miocene	51B49R_22	3362	Clinozoisite	0.163288
51B49R	Lower Miocene	51B49R_23	3381	Epidote	0.298226
51B49R	Lower Miocene	51B49R_24	3386	Epidote	0.333736
51B49R	Lower Miocene	51B49R_26	3360	Clinozoisite	0.149084
51B49R	Lower Miocene	51B49R_27	3376	Epidote	0.262716
51B49R	Lower Miocene	51B49R_28	3366	Clinozoisite	0.191696
51B49R	Lower Miocene	51B49R_29	3379	Epidote	0.284022
51B49R	Lower Miocene	51B49R_30	3353	Clinozoisite	0.09937
51B49R	Lower Miocene	51B49R_31	3370	Epidote	0.220104
51B49R	Lower Miocene	51B49R_32	3356	Clinozoisite	0.120676
51B49R	Lower Miocene	51B49R_33	3378	Epidote	0.27692
51B49R	Lower Miocene	51B49R_34	3372	Epidote	0.234308
51B49R	Lower Miocene	51B49R_35	3380	Epidote	0.291124
51B49R	Lower Miocene	51B49R_36	3385	Epidote	0.326634
51B49R	Lower Miocene	51B49R_37	3366	Clinozoisite	0.191696
51B49R	Lower Miocene	51B49R_38	3371	Epidote	0.227206
51B49R	Lower Miocene	51B49R_39	3380	Epidote	0.291124
51B49R	Lower Miocene	51B49R_40	3363	Clinozoisite	0.17039
51B49R	Lower Miocene	51B49R_43	3383	Epidote	0.31243
51B49R	Lower Miocene	51B49R_44	3372	Epidote	0.234308
51B49R	Lower Miocene	51B49R_45	3381	Epidote	0.298226
51B49R	Lower Miocene	51B49R_46	3372	Epidote	0.234308
51B55R	Lower Miocene	51B55R_2	3394	Epidote	0.390552
51B55R	Lower Miocene	51B55R_3	3378	Epidote	0.27692
51B55R	Lower Miocene	51B55R_4	3396	Epidote	0.404756
51B55R	Lower Miocene	51B55R_5	3383	Epidote	0.31243
51B55R	Lower Miocene	51B55R_8	3400	Epidote	0.433164
51B55R	Lower Miocene	51B55R_9	3380	Epidote	0.291124
51B55R	Lower Miocene	51B55R_10	3374	Epidote	0.248512
51B55R	Lower Miocene	51B55R_11	3374	Epidote	0.248512
51B55R	Lower Miocene	51B55R_12	3378	Epidote	0.27692
51B55R	Lower Miocene	51B55R_16	3374	Epidote	0.248512
51B55R	Lower Miocene	51B55R_17	3368	Clinozoisite	0.2059
51B55R	Lower Miocene	51B55R_20	3361	Clinozoisite	0.156186
51B55R	Lower Miocene	51B55R_22	3376	Epidote	0.262716
51B55R	Lower Miocene	51B55R_23	3365	Clinozoisite	0.184594
51B55R	Lower Miocene	51B55R_26	3385	Epidote	0.326634
51B55R	Lower Miocene	51B55R_27	3360	Clinozoisite	0.149084
51B55R	Lower Miocene	51B55R_29	3365	Clinozoisite	0.184594
51B55R	Lower Miocene	51B55R_30	3374	Epidote	0.248512
51B55R	Lower Miocene	51B55R_31	3373	Epidote	0.24141
51B55R	Lower Miocene	51B55R_32	3382	Epidote	0.305328
51B55R	Lower Miocene	51B55R_33	3376	Epidote	0.262716
51B55R	Lower Miocene	51B55R_34	3380	Epidote	0.291124
51B55R	Lower Miocene	51B55R_35	3392	Epidote	0.376348
51B55R	Lower Miocene	51B55R_37	3378	Epidote	0.27692
51B55R	Lower Miocene	51B55R_38	3365	Clinozoisite	0.184594
51B55R	Lower Miocene	51B55R_39	3385	Epidote	0.326634
51B55R	Lower Miocene	51B55R_40	3363	Clinozoisite	0.17039
51B55R	Lower Miocene	51B55R_42	3395	Epidote	0.397654
51B55R	Lower Miocene	51B55R_43	3379	Epidote	0.284022
51B55R	Lower Miocene	51B55R_44	3365	Clinozoisite	0.184594
51B55R	Lower Miocene	51B55R_45	3376	Epidote	0.262716
51B55R	Lower Miocene	51B55R_48	3368	Clinozoisite	0.2059
51B55R	Lower Miocene	51B55R_49	3385	Epidote	0.326634
51B55R	Lower Miocene	51B55R_50	3377	Epidote	0.269818
51B55R	Lower Miocene	51B55R_51	3359	Clinozoisite	0.141982
51B55R	Lower Miocene	51B55R_52	3367	Clinozoisite	0.198798
51B55R	Lower Miocene	51B55R_54	3366	Clinozoisite	0.191696
51B55R	Lower Miocene	51B55R_57	3378	Epidote	0.27692
51B55R	Lower Miocene	51B55R_58	3363	Clinozoisite	0.17039
51B55R	Lower Miocene	51B55R_59	3359	Clinozoisite	0.141982
51B55R	Lower Miocene	51B55R_60	3379	Epidote	0.284022
51B55R	Lower Miocene	51B55R_61	3358	Clinozoisite	0.13488
51B55R	Lower Miocene	51B55R_62	3380	Epidote	0.291124
51B55R	Lower Miocene	51B55R_63	3371	Epidote	0.227206
51B55R	Lower Miocene	51B55R_64	3386	Epidote	0.333736
51B55R	Lower Miocene	51B55R_66	3387	Epidote	0.340838
51B55R	Lower Miocene	51B55R_67	3375	Epidote	0.255614
51B55R	Lower Miocene	51B55R_68	3368	Clinozoisite	0.2059
51B55R	Lower Miocene	51B55R_69	3377	Epidote	0.269818
51B55R	Lower Miocene	51B55R_70	3376	Epidote	0.262716
51B55R	Lower Miocene	51B55R_71	3374	Epidote	0.248512
51B55R	Lower Miocene	51B55R_72	3380	Epidote	0.291124
51B55R	Lower Miocene	51B55R_73	3371	Epidote	0.227206
51B55R	Lower Miocene	51B55R_74	3392	Epidote	0.376348
51B55R	Lower Miocene	51B55R_75	3378	Epidote	0.27692
